# Supplementary material
Source: PubMed Central journal article supplement (PMC6071859)
Supplement: NIHMS78071-supplement-Supplementary_information.pdf [file NIHMS78071-supplement-Supplementary_information.pdf]

## **Supplementary Information**

The Type VI secretion system deploys anti-fungal effectors against microbial competitors

Katharina Trunk, Julien Peltier, Yi-Chia Liu, Brian D. Dill, Louise Walker, Neil A.R. Gow, Michael J.R. Stark, Janet Quinn, Henrik Strahl, Matthias Trost and Sarah J. Coulthurst

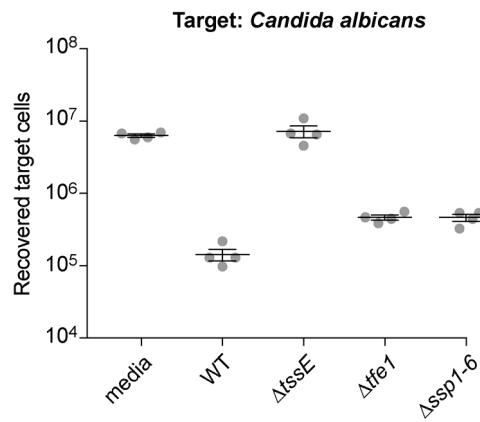

**Supplementary Figure 1. The effectors Ssp1, Ssp2, Ssp4, Ssp5 and Ssp6 do not contribute to the anti-fungal activity of the *Serratia marcescens* Db10 Type VI secretion system.** Shown is the number of recovered cells of *Candida albicans* SC5314 following co-culture with wild type (WT) or mutant ( $\Delta tssE$ ,  $\Delta tfe1$  and  $\Delta ssp1-ssp6$ ) strains of *S. marcescens* Db10. Cells of *C. albicans* were also cultured in the presence of sterile media alone (media). Individual data points are overlaid with the mean  $\pm$  SEM (n=4 biological replicates).

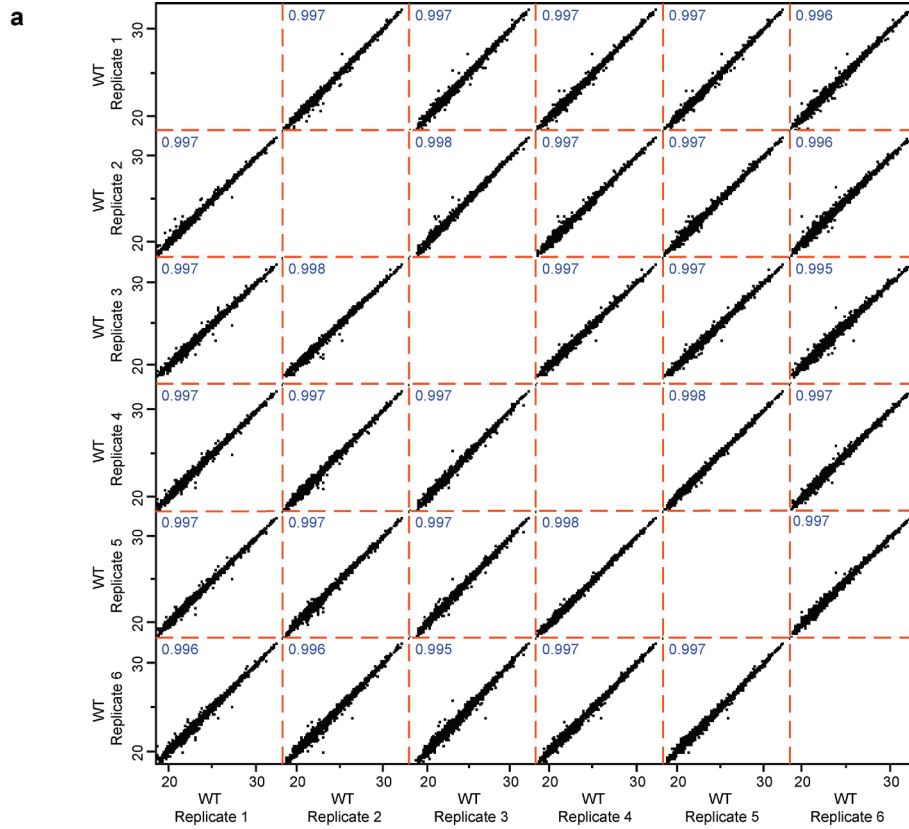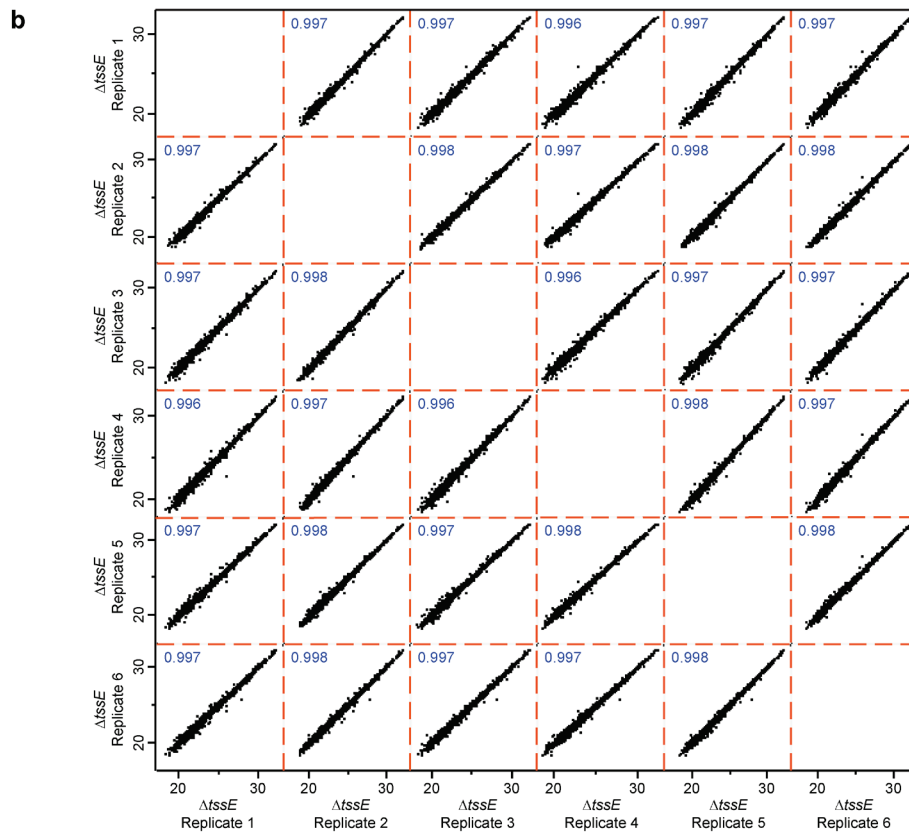

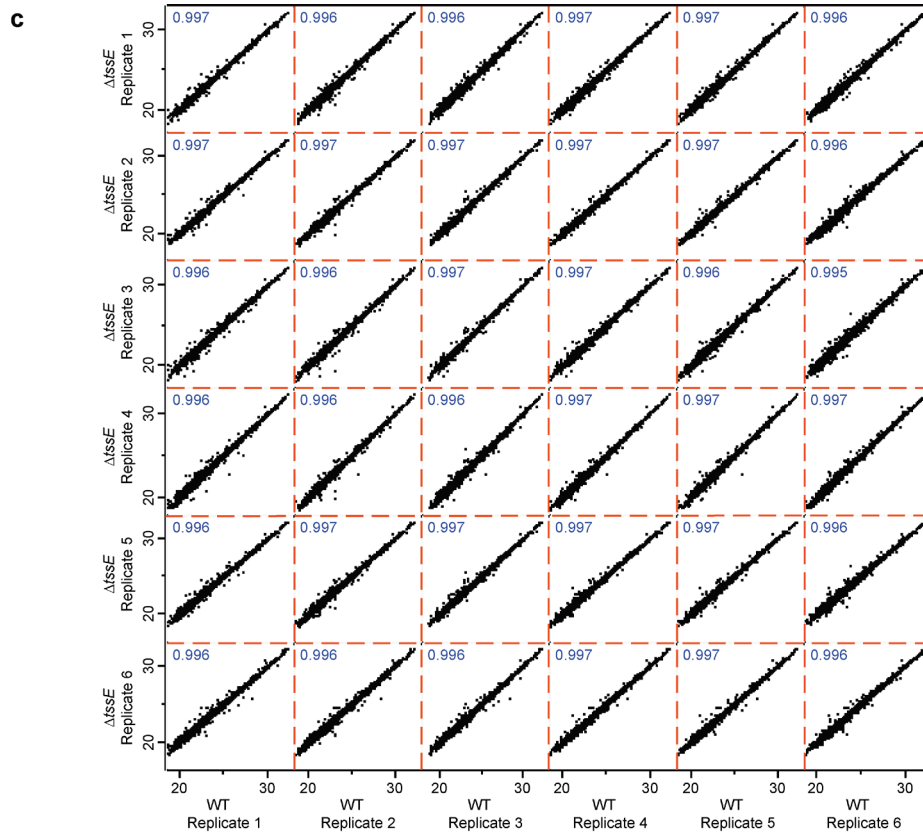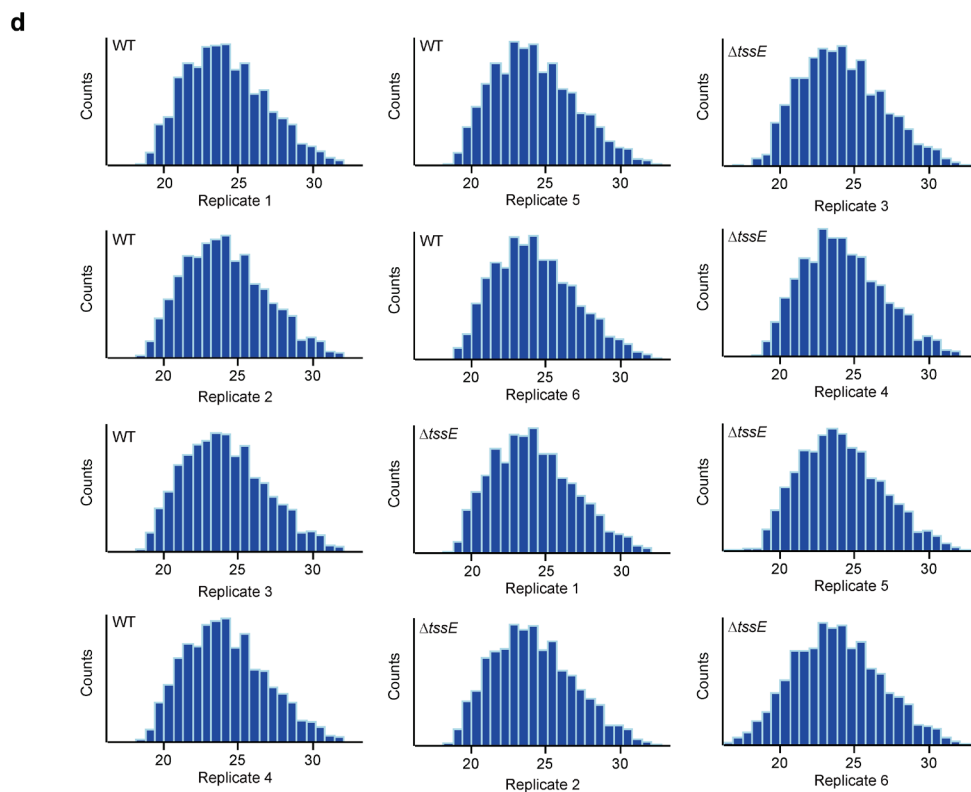

**Supplementary Figure 2. Multi-scatter plots and histograms showing the reproducibility of the LFQ proteomics experiments.** (a-c) Multi-scatter plots show high reproducibility between six individual biological replicate samples of *S. marcescens* Db10 (WT) (a), between six replicates of  $\Delta tssE$  (b), and between Db10 and  $\Delta tssE$  samples (c). The calculated Pearson correlation is displayed in blue. (d) Intensity distribution histograms of each replicate show log-normal distributions and equal loading of samples.

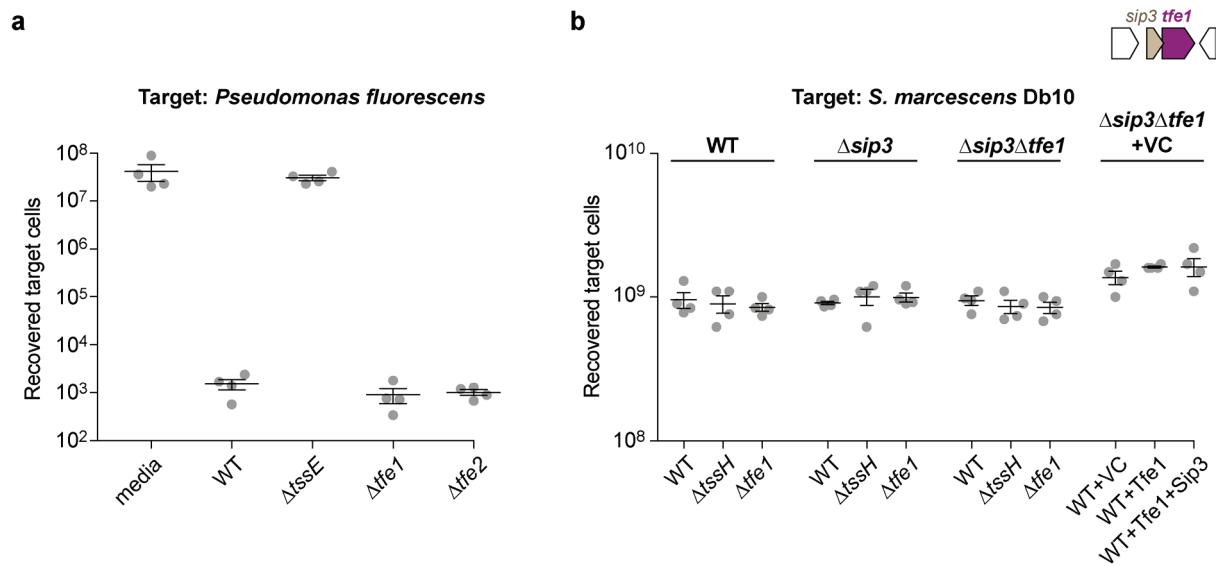

**Supplementary Figure 3. The anti-fungal effectors Tfe1 and Tfe2 do not contribute to function or anti-bacterial activity of the Type VI secretion system.** (a) Loss of Tfe1 or Tfe2 does not affect T6SS-dependent anti-bacterial activity against *Pseudomonas fluorescens*. Recovery of *P. fluorescens* following co-culture with wild type (WT) or mutant ( $\Delta tssE$ ,  $\Delta tfe1$  and  $\Delta tfe2$ ) strains of *Serratia marcescens* Db10 as attacker, or following culture with sterile media alone (media). (b) A mutant lacking the cognate ‘immunity protein’ for Tfe1, Sip3, is not susceptible to wild type *S. marcescens*. Recovery of different target strains of *S. marcescens*, wild type (WT, Db11),  $\Delta sip3$  (KT69),  $\Delta sip3\Delta tfe1$  (KT98), or  $\Delta sip3\Delta tfe1$  carrying the vector control plasmid (+VC, pBAD18Kn), following co-culture with attacking strains of *S. marcescens* Db10. These attackers were wild type Db10 (WT), the T6SS-inactive mutant  $\Delta tssH$  and the effector mutant  $\Delta tfe1$ , or the wild type carrying either the vector control plasmid (+VC) or a plasmid directing the expression of Tfe1 (+Tfe1, pSC1231) or of the immunity-effector pair Sip3-Tfe1 (+Tfe1+Sip3, pSC1232). In each case, the target strain additionally carries streptomycin resistance (Supplementary Table 2). Inset, arrangement of *sip3* and *tfe1* (formerly known as *ssp3*) genes. (a,b) data points are overlaid with the mean  $\pm$  SEM (n=4 biological replicates).

### Supplementary Figure 4

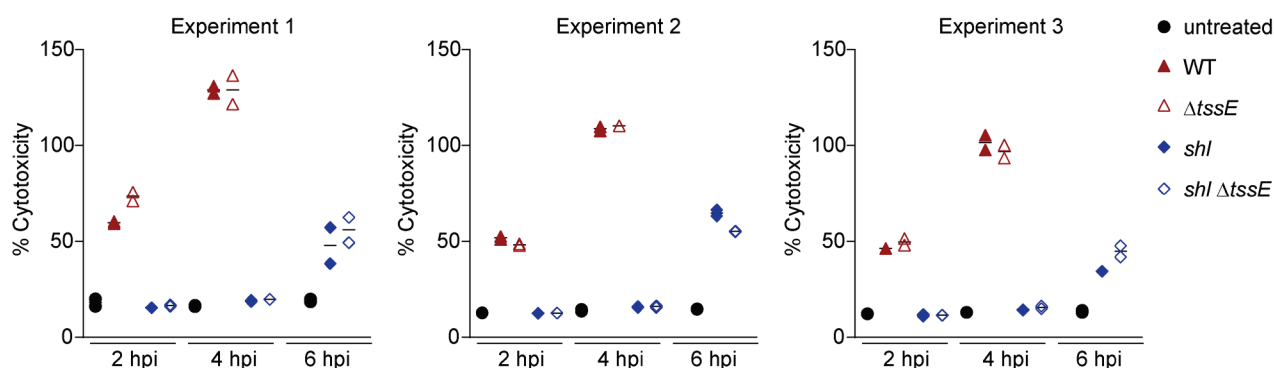

**Supplementary Figure 4. The *S. marcescens* Type VI secretion system has no impact on cytotoxicity towards RAW264.7 cells.** RAW264.7 macrophage-like cells were infected with strains of *S. marcescens* at a multiplicity of infection of 10:1 and lactate dehydrogenase (LDH) release measured after 2, 4 or 6 hours. Cytotoxicity is expressed as a percentage of the value of extracellular LDH obtained from total lysis of the RAW cells using 0.1% Triton X-100. Strains of *S. marcescens* used were wild type Db10 (WT), a T6SS mutant ( $\Delta tssE$ ), a mutant unable to produce secreted haemolysin (*shl*), and the T6SS mutant in the haemolysin-null background (*shl*  $\Delta tssE$ ); as negative control no bacteria were added (untreated). The Shl haemolysin is the primary virulence factor of *Serratia marcescens* and thus could potentially have masked any T6SS-dependent effect. Three independent experiments are shown, with individual values from duplicate culture wells given.

## Supplementary Figure 5

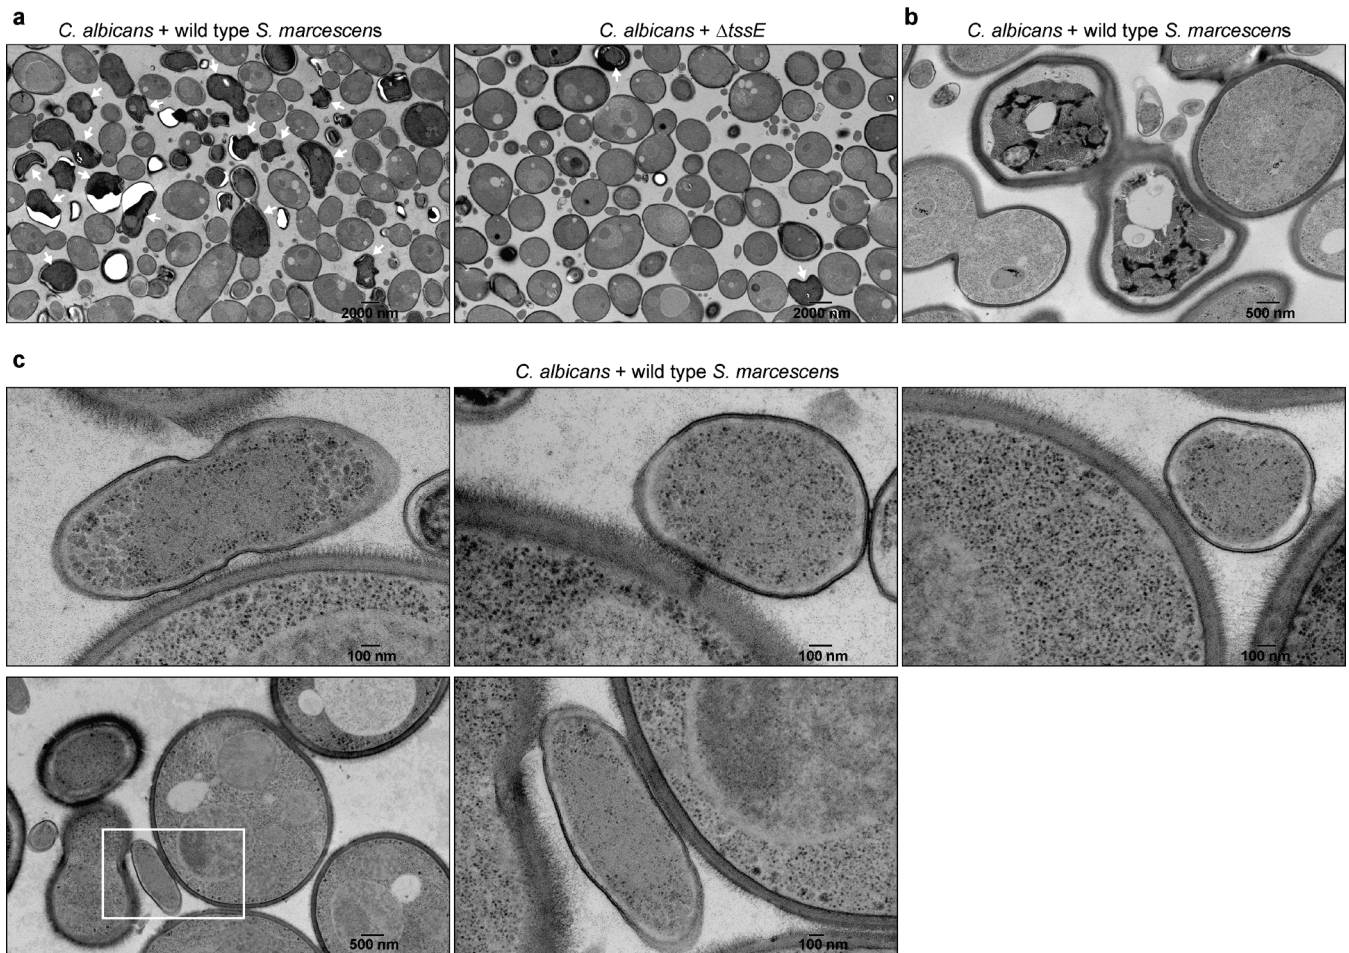

**Supplementary Figure 5. Cryo-TEM reveals Type VI secretion system-dependent necrosis and intimate association between cells of *Candida albicans* and *Serratia marcescens*.** (a) Cryo-TEM images of multiple cells from co-cultures of *C. albicans* SC5314 with either wild type (left) or  $\Delta tssE$  (right) *S. marcescens* Db10. Examples of necrotic *C. albicans* cells are indicated with white arrows. (b) Higher magnification image of two necrotic *C. albicans* cells. (c) Cryo-TEM images of individual cells from co-cultures of *C. albicans* with *S. marcescens*, showing a very tight interface between the bacterial and fungal cells. The white box shows an area enlarged in the adjacent panel. Images were acquired on one occasion and are representative of three sections and at least 60 *C. albicans* cells observed at high magnification.

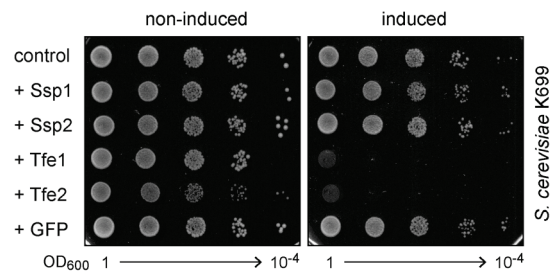

**Supplementary Figure 6. The anti-bacterial effectors Ssp1 and Ssp2 do not cause toxicity upon artificial expression in yeast.** Growth of *S. cerevisiae* K699 carrying the empty vector (pRB1438, control) or plasmids directing expression of Ssp1, Ssp2, Tfe1, Tfe2 or GFP on non-inducing (2% glucose) and inducing (2% raffinose) media. Representative of two independent experiments.



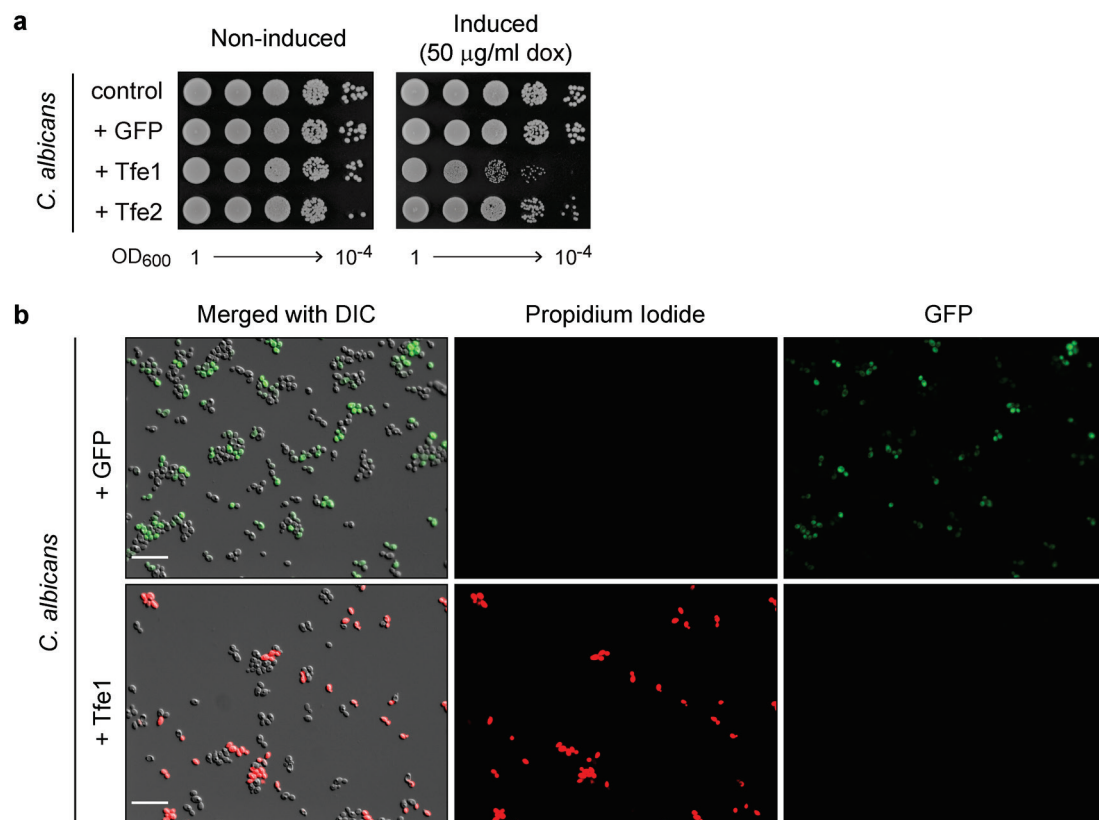

**Supplementary Figure 7. Tfe1 displays toxicity when artificially expressed in cells of *C. albicans*.** (a) Growth of *C. albicans* SC5314 (control) and derivatives expressing GFP (+GFP, KT158), Tfe1 (+Tfe1, KT159) or Tfe2 (+Tfe2, KT160) on non-inducing and inducing media (dox, doxycycline). Representative of three independent experiments. (b) Fluorescence microscopy of *C. albicans* SC5314 expressing Tfe1 or control protein GFP, and subjected to propidium iodide staining following a 3.5 h induction period. Shown are the single and merged GFP and propidium iodide channels, and their overlays on the corresponding DIC images. Representative of two independent experiments. Scale bar, 25  $\mu$ m.

**a**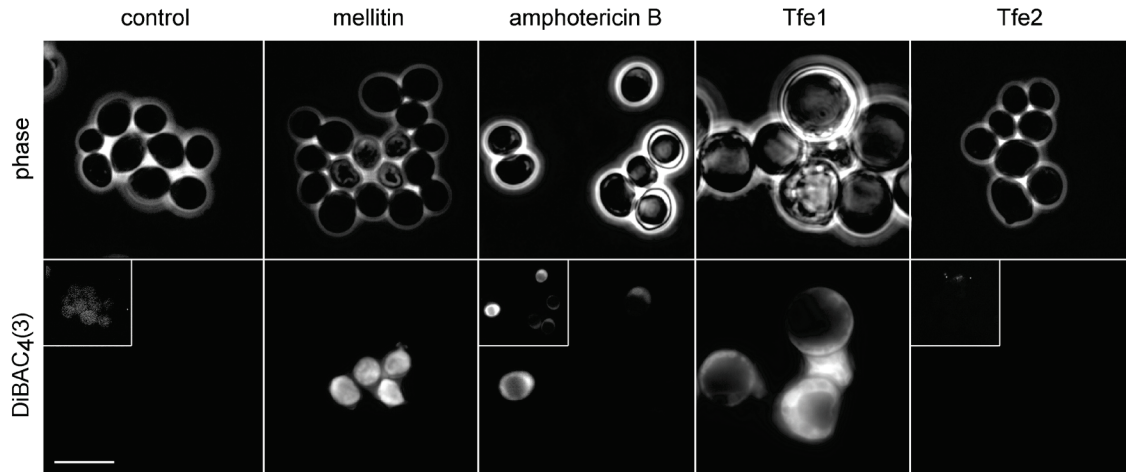**b**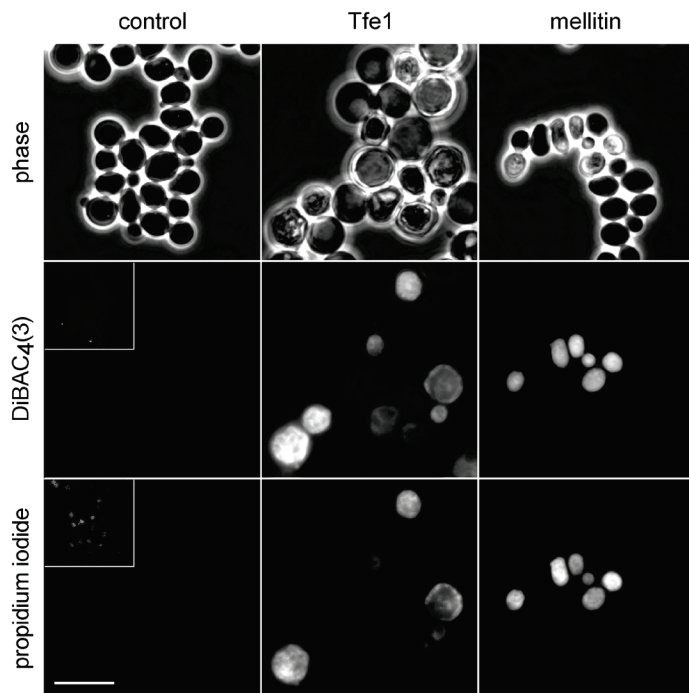**c**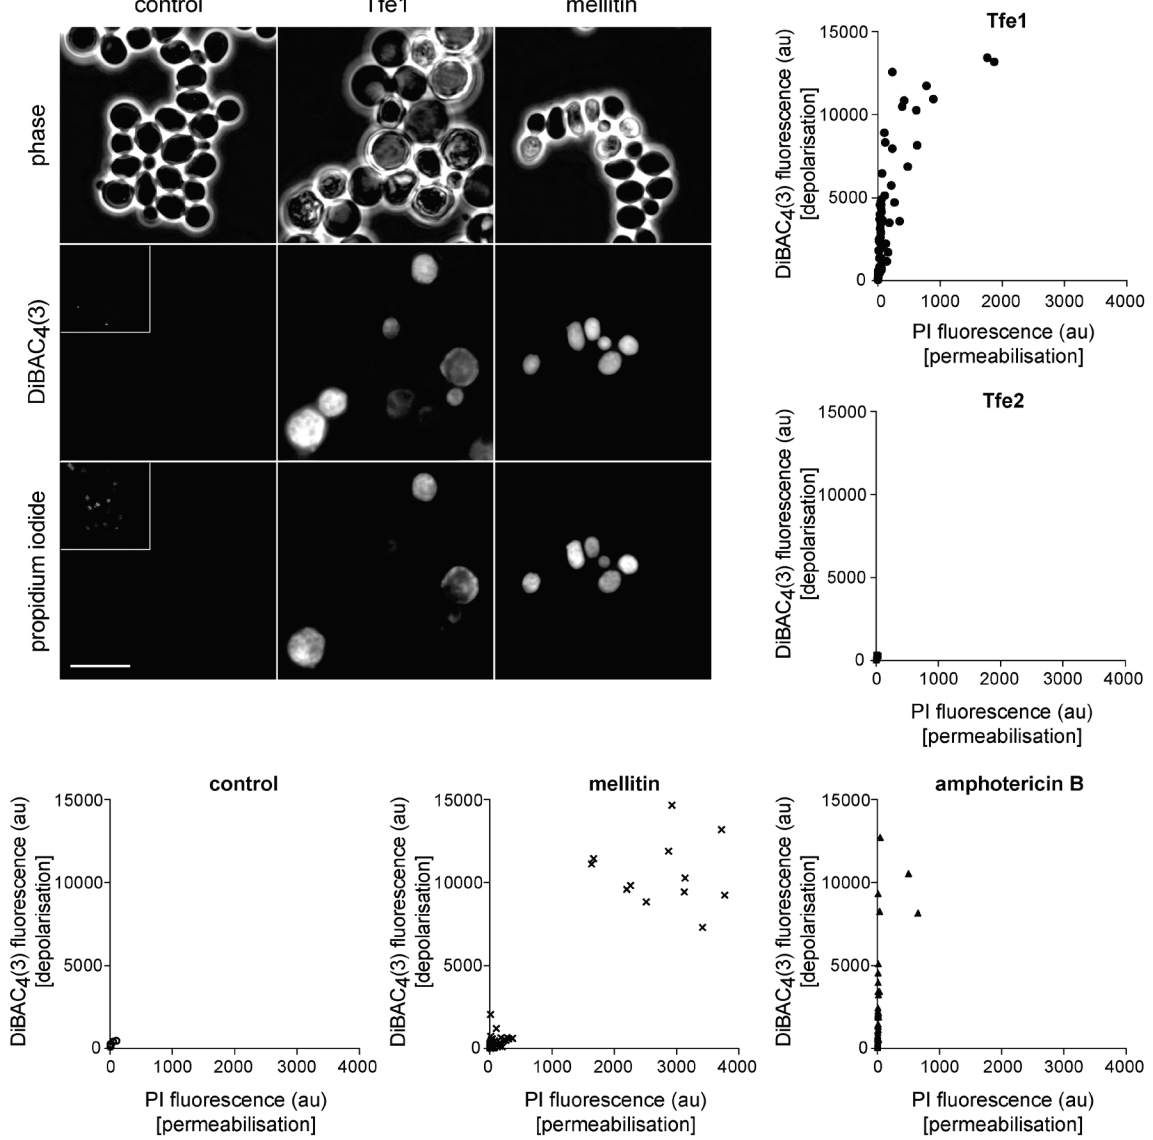

**Supplementary Figure 8. Determination of the impact of Tfe1 and Tfe2 expression on membrane potential and permeability in *Saccharomyces cerevisiae*.** (a) Phase contrast (top) and fluorescence microscopy of *S. cerevisiae* K699 cells stained with the potential-sensitive dye DiBAC<sub>4</sub>(3), which stains cells in a depolarisation-dependent manner (bottom). The strains used were K699 chromosomal integration strains harbouring the empty promoter construct (control) or derivatives expressing Tfe1 or Tfe2. The control cells were additionally treated with 10 μM mellitin (membrane depolarization through pore formation) or 3 μg/ml amphotericin B (membrane depolarization without pore formation) as positive controls. The large fluorescence images depict the cells with identical contrast settings. In the smaller inserts, the contrast of the fluorescence image is increased to reveal weakly stained cells. Scale bar, 8 μm. (b) As part a, but including co-staining with propidium iodide, which can cross permeabilised membranes, for control, Tfe1-expressing and mellitin-treated cells (bottom panel). Scale bar, 8 μm. (c) Cellular DiBAC<sub>4</sub>(3) and propidium iodide fluorescence values were quantified for control cells, those expressing Tfe1 or Tfe2, and those treated with mellitin or amphotericin B. Scatter plots depict fluorescence intensity values of individual cells for both dyes. Data shown are representative of two independent experiments.

### Supplementary Figure 9

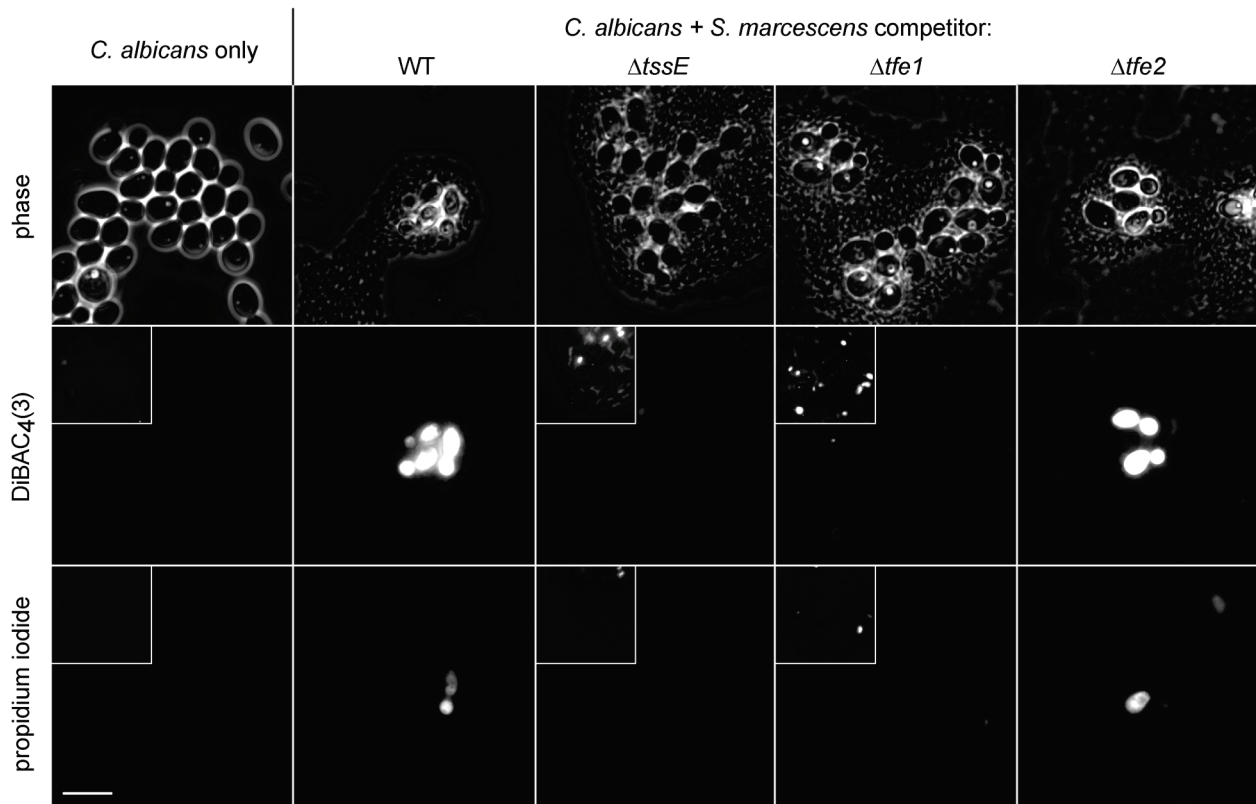

**Supplementary Figure 9. Determination of the impact of Tfe1 and Tfe2 delivery on membrane potential and permeability of *C. albicans* when co-cultured with strains of *S. marcescens*.** Phase contrast (top panels), and fluorescence microscopy of *C. albicans* SC5314 cells, following co-culture with the indicated strains of *S. marcescens* and co-staining with the potential-sensitive dye DiBAC<sub>4</sub>(3) which stains cells in a depolarisation-dependent manner (middle panels), and propidium iodide which can cross permeabilised membranes (bottom panels). The large fluorescence images depict the cells with identical contrast settings. In the smaller inserts, the contrast of the fluorescence image is increased to reveal weakly stained cells. Scale bar, 8  $\mu$ m. Data shown are representative of two independent experiments.

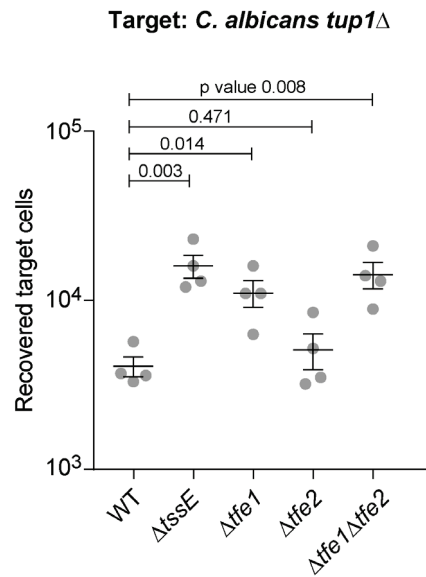

**Supplementary Figure 10. Activity of the *S. marcescens* T6SS against hyphae of *C. albicans* measured using viable cell counting.** Recovery of viable cells (colony forming units) of the constitutively filamentous mutant of *C. albicans*, *tup1*Δ, following co-culture with wild type or mutant ( $\Delta tssE$ ,  $\Delta tfe1$ ,  $\Delta tfe2$  and  $\Delta tfe1\Delta tfe2$ ) strains of *S. marcescens* Db10. Note that, as observed in Figure 4, only a fraction of individual cells within the hyphal filament are intoxicated, explaining why the T6SS-dependent reduction in viable cell counts is smaller than that observed using yeast form cells (Figure 1). Individual data points are overlaid with the mean  $\pm$  SEM (n=4 biological replicates) and p values are shown from unpaired, two-sided t-test.

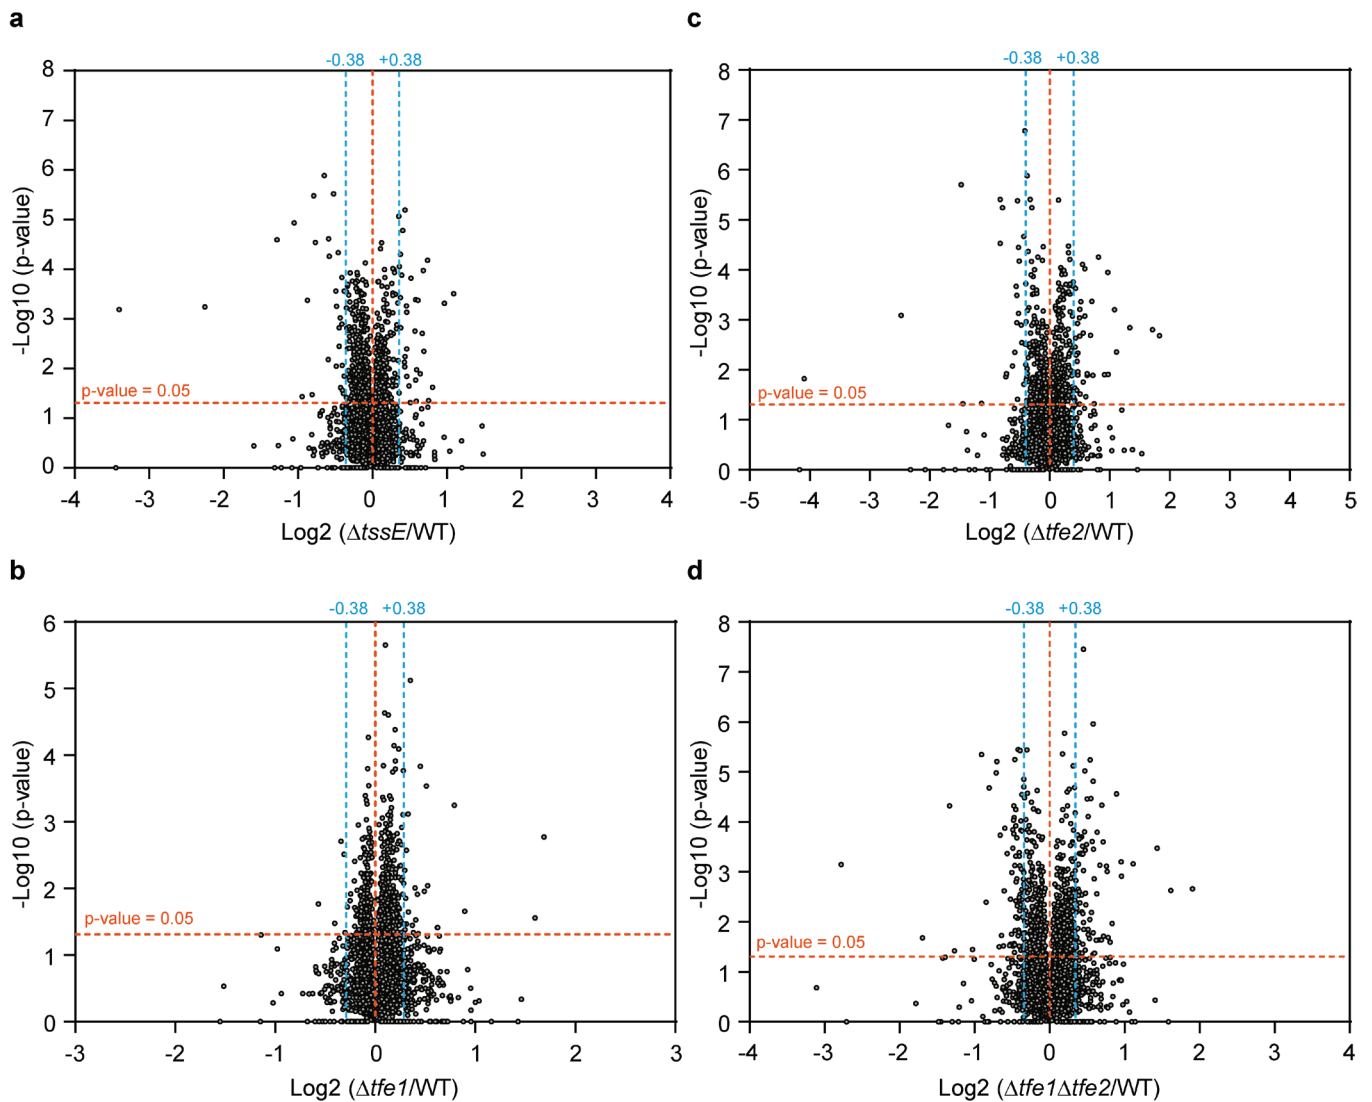

**Supplementary Figure 11. Volcano plot of *Candida albicans* proteins from ‘in competition’ proteomics experiments.** Volcano plots summarising the changes in *C. albicans* proteins following co-culture of *C. albicans* with wild type *S. marcescens* Db10 (WT) compared to co-culture with  $\Delta\text{tssE}$  (a),  $\Delta\text{tfe1}$  (b),  $\Delta\text{tfe2}$  (c) or  $\Delta\text{tfe1}\Delta\text{tfe2}$  (d) mutants, using TMT-based quantification (n=6 biological replicates). The  $\text{log}_2$  of the ratios of protein intensities between the wild type and the  $\Delta\text{tssE}$ ,  $\Delta\text{tfe1}$ ,  $\Delta\text{tfe2}$  or  $\Delta\text{tfe1}\Delta\text{tfe2}$  mutants are plotted against the  $-\text{log}_{10}$  of t-test p-values. Cut-off values of  $\text{log}_2$  ratios and  $-\text{log}_{10}$  of t-test p-value are represented in blue ( $\pm 1.3$ -fold) and orange ( $\text{p-value} = 0.05$ ), respectively.

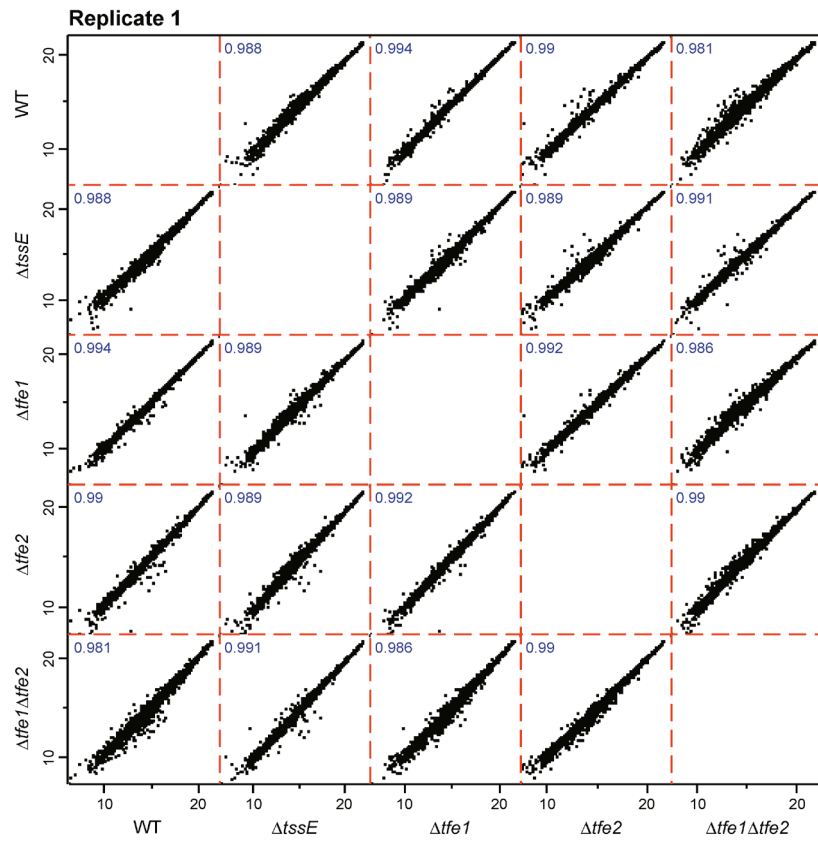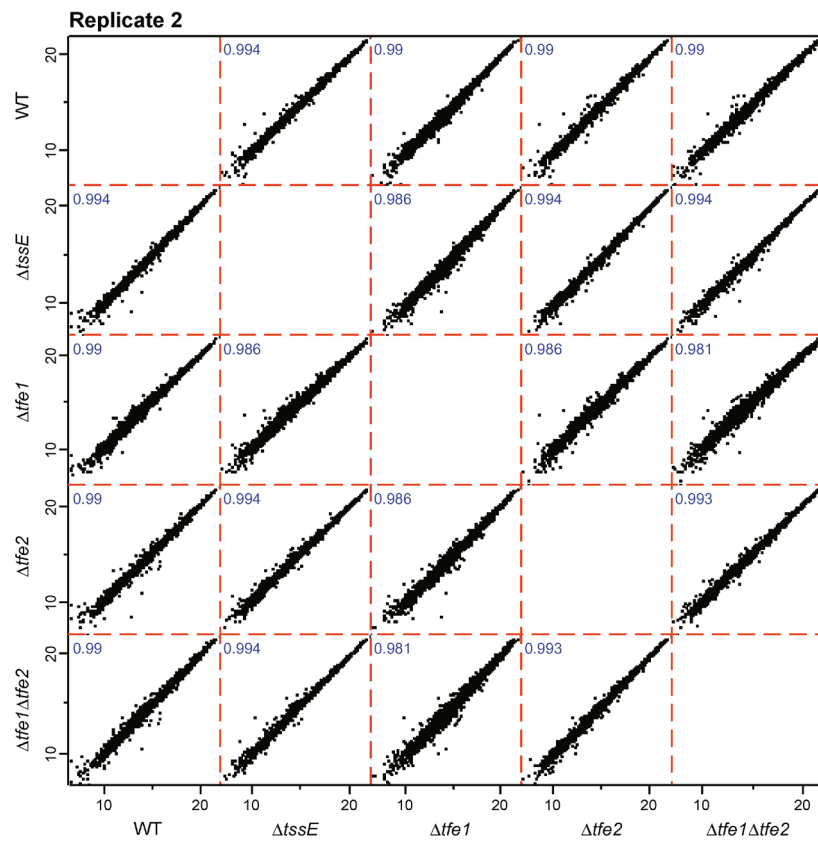

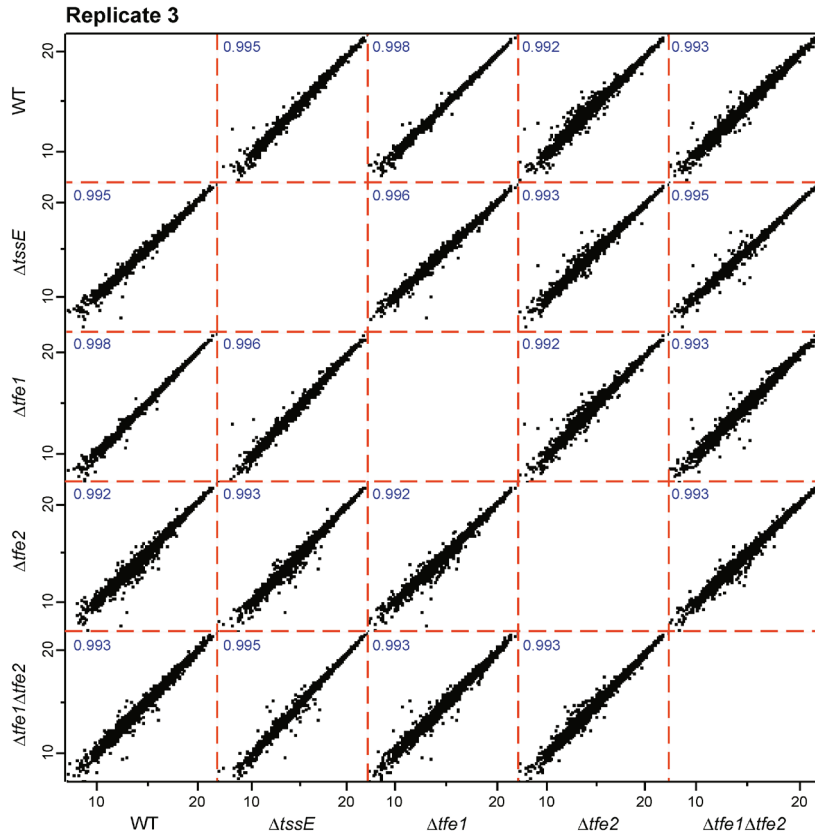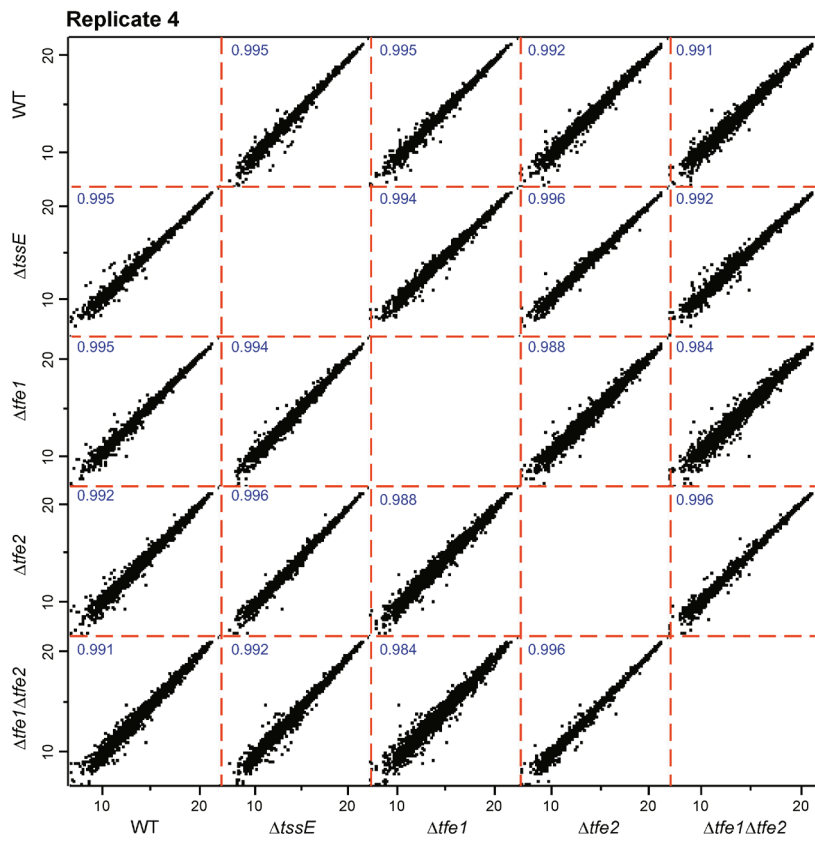



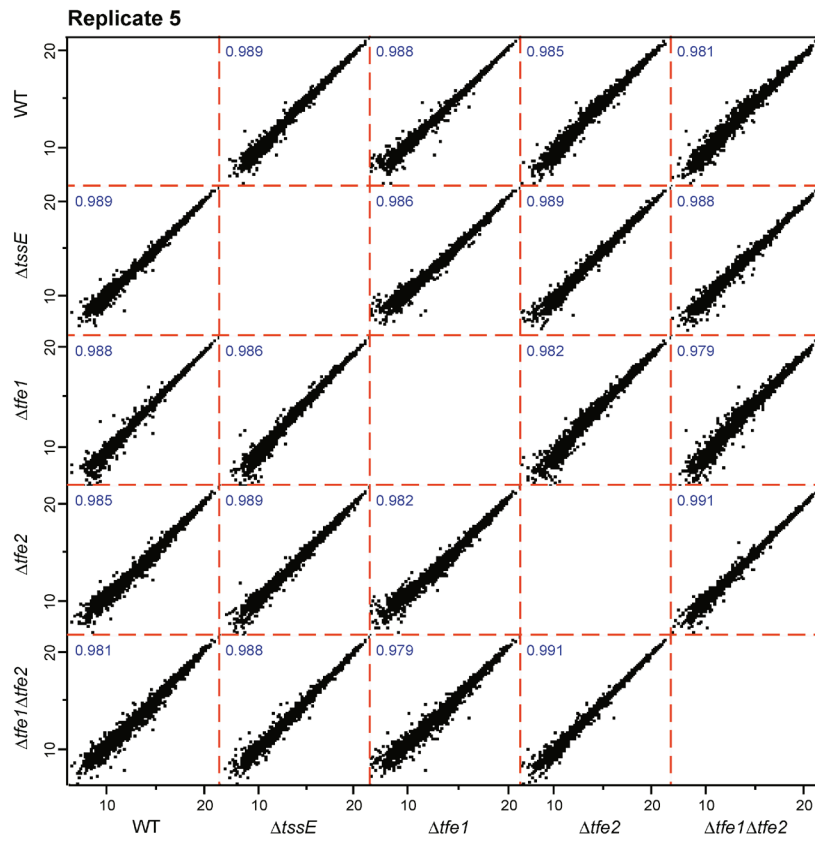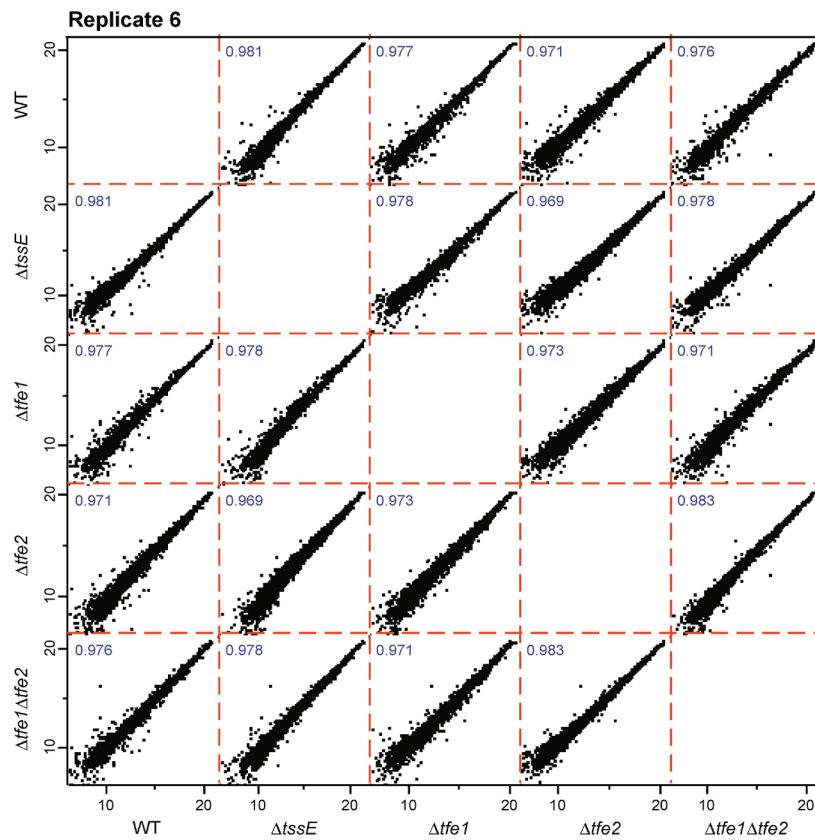

**Supplementary Figure 12. Multi-scatter plots from ‘in competition’ proteomics experiment show high-reproducibility.** Multi-scatter plots comparing the log<sub>2</sub> intensities from the TMT-based MS3

quantification of the *C. albicans* proteome after co-culture with wild type *S. marcescens* Db10 (WT) and with mutants  $\Delta tssE$ ,  $\Delta tfe1$ ,  $\Delta tfe2$  or  $\Delta tfe1\Delta tfe2$  for all six biological replicates. The calculated Pearson correlation is displayed in blue, showing an excellent reproducibility between the different types of strains and replicates (Pearson correlation >0.95).

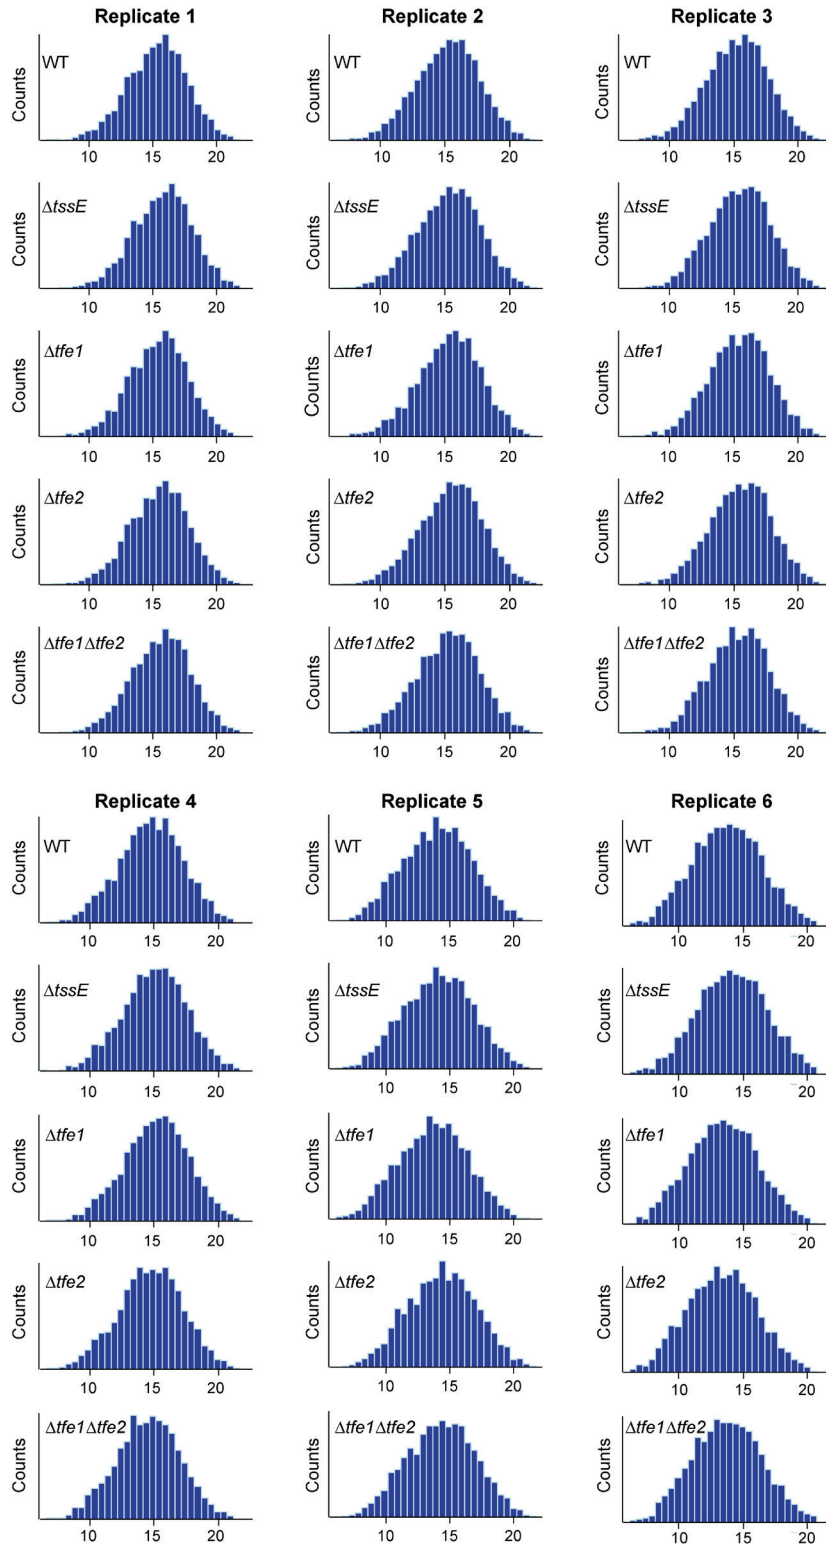

**Supplementary Figure 13. Intensity distribution histograms of *Candida albicans* proteins show the reproducibility of the ‘in competition’ proteomics experiments.** Intensity distribution histograms of *C. albicans* proteins following co-culture with wild type *S. marcescens* Db10 (WT),  $\Delta tssE$ ,  $\Delta tfe1$ ,  $\Delta tfe2$  or  $\Delta tfe1\Delta tfe2$  in six TMT replicates show log-normal distributions of the non-normalised data and equal loading of samples.

**a**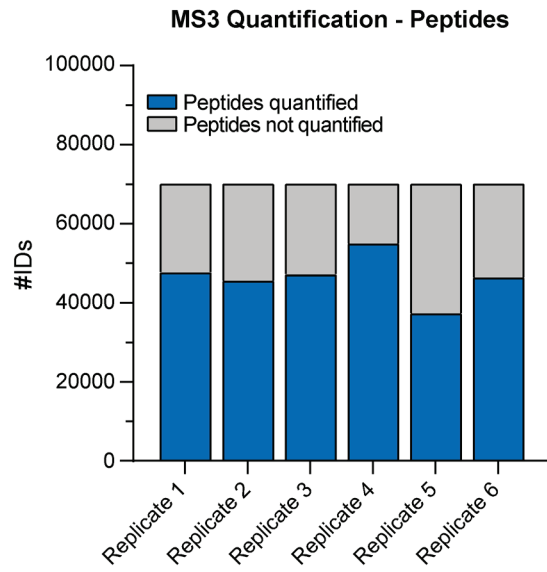**b**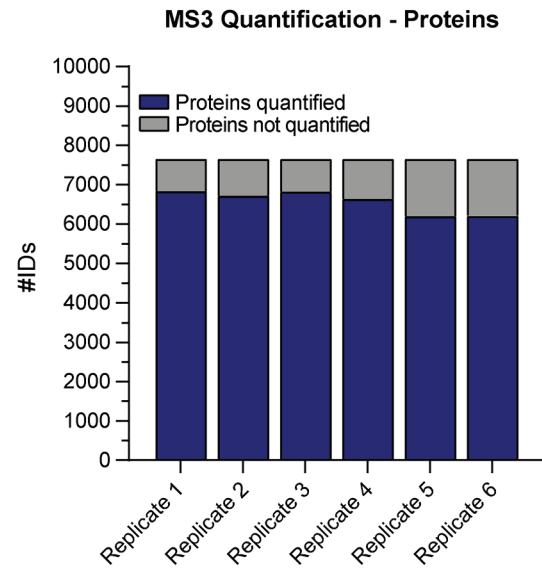

**Supplementary Figure 14. Peptides and proteins quantified in each replicate of the ‘in competition’ proteomics experiments.** Number of unique peptides (a) and proteins (b) identified and quantified over the six replicates.

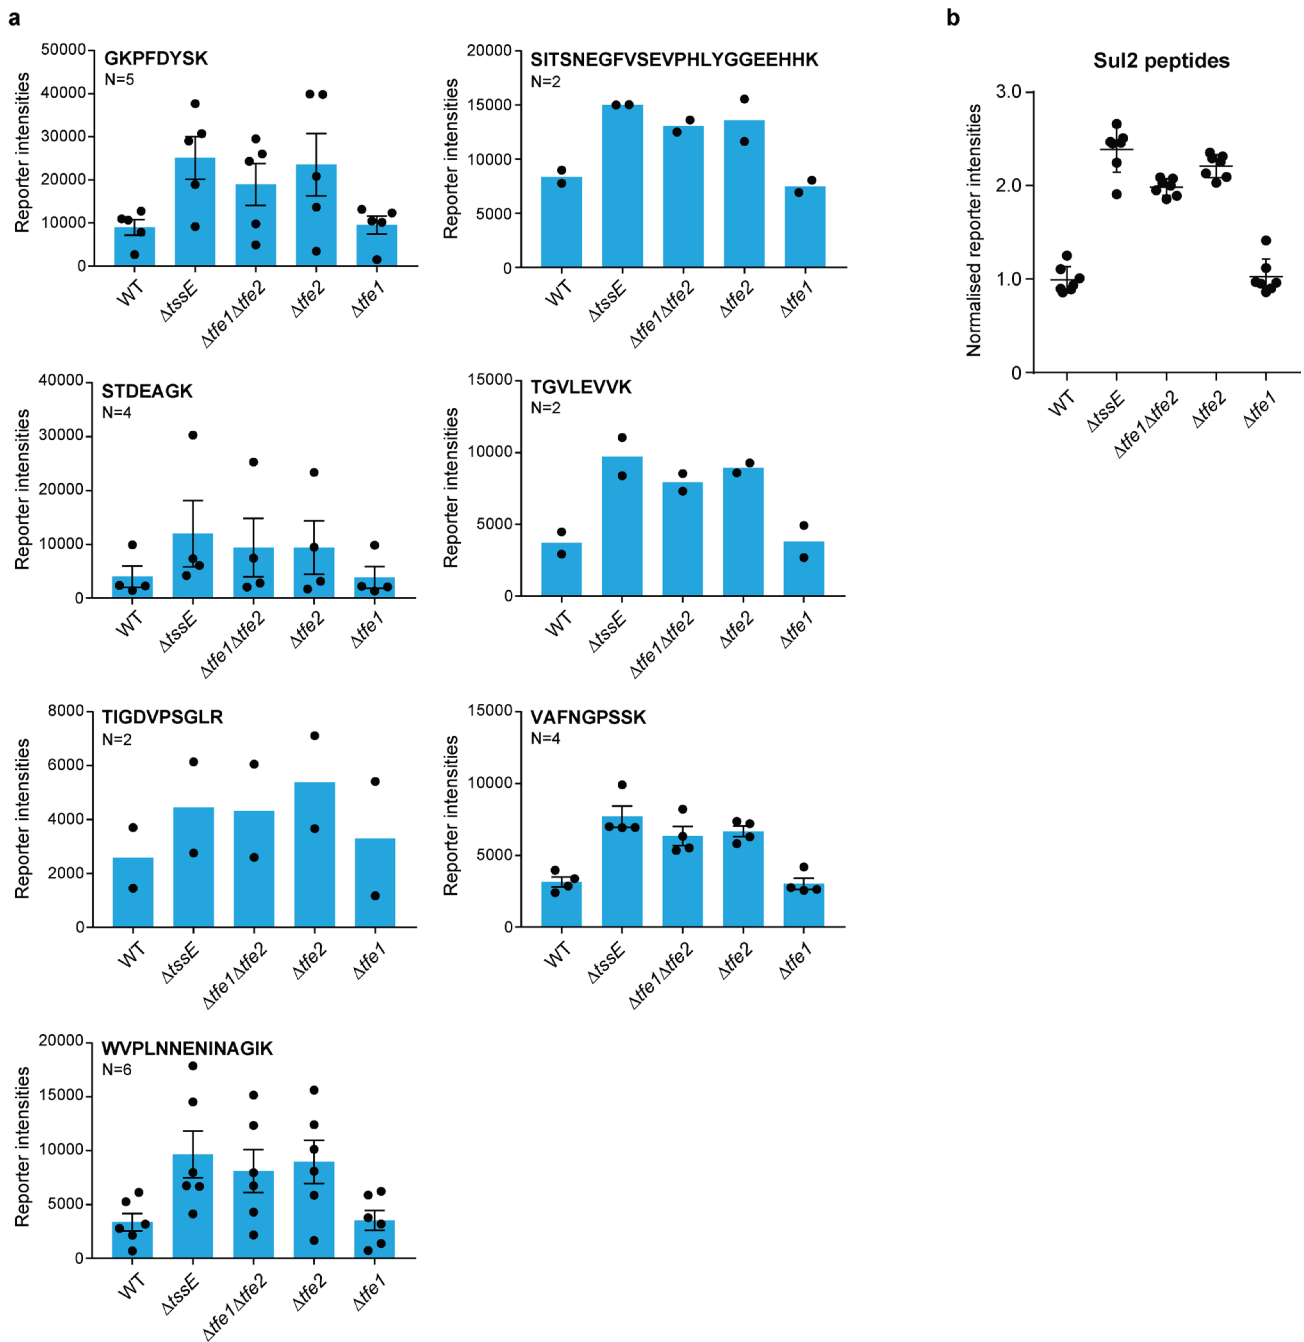

**Supplementary Figure 15. Quantification data for Sul2, an example of a *C. albicans* transporter protein downregulated by Tfe2-mediated intoxication.** (a) Extracted TMT intensities for unique individual peptides of Sul2 from total cellular protein samples from co-cultures of *C. albicans* with *S. marcescens* Db10 (WT),  $\Delta tssE$ ,  $\Delta tfe1$ ,  $\Delta tfe2$  or  $\Delta tfe1\Delta tfe2$ . Blue bars show the mean intensity values, error bars represent  $\pm$  SEM with individual data points overlaid, and “N” states the number of quantifications of the peptide over the six injected TMT replicates. (b) Normalised extracted TMT intensity ratios from the seven Sul2 unique peptides in (a). Data are shown as mean  $\pm$  SEM.

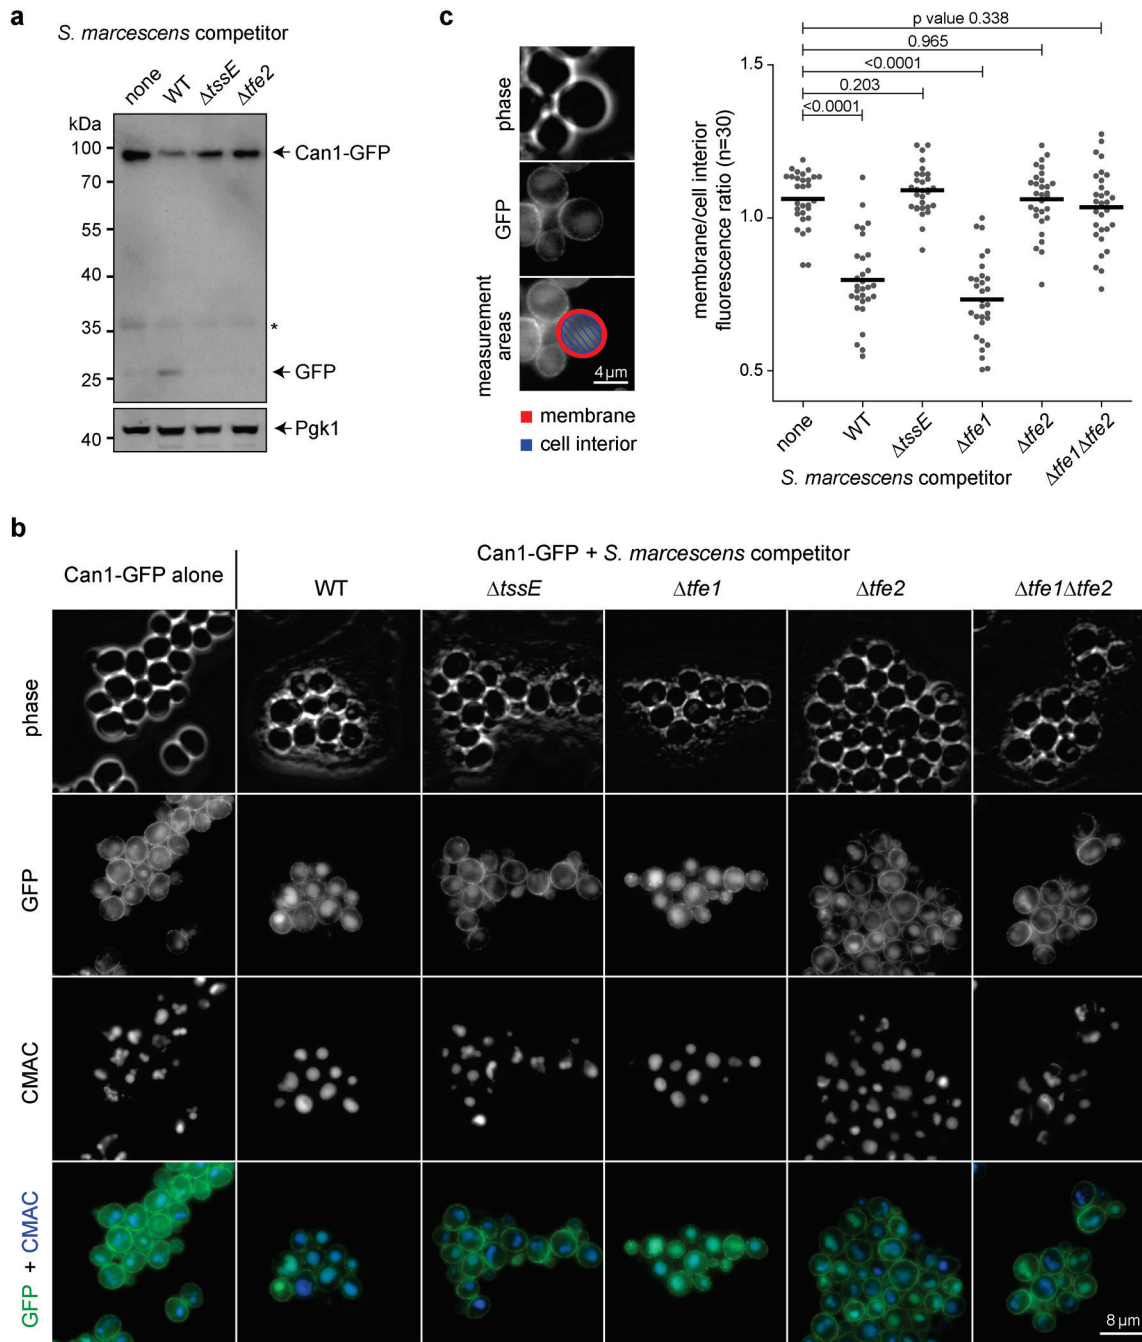

**Supplementary Figure 16. Intoxication of *S. cerevisiae* by T6SS-delivered Tfe2 results in a decrease in total levels of Can1 and its redistribution from the plasma membrane to the vacuole.** (a) Immunoblot detection of Can1-GFP in *S. cerevisiae* BY4741 *CAN1-GFP*, when cultured alone or with wild type (WT) or mutant ( $\Delta tssE$ ,  $\Delta tfe2$ ) strains of *S. marcescens* Db10. Pgc1 is included as a loading control; \*, non-specific band; the full, uncropped blots can be found in Supplementary Fig. 18. Representative of three independent experiments. (b) Fluorescence microscopy of *S. cerevisiae* BY4741 *CAN1-GFP* following culture alone or with strains of *S. marcescens* Db10 as indicated, and staining with the vacuolar dye CMAC. From top to bottom, panels show phase contrast, GFP fluorescence, CMAC fluorescence, and a merge of the GFP and CMAC channels. Scale bar, 8  $\mu$ m. Representative of two independent experiments. (c) Quantification of the relative distribution of Can1-GFP fluorescence signal between an exterior (plasma membrane) location and an interior location (including the vacuole) for the co-cultures shown in part b. Left, schematic of manually defined cell areas (scale bar, 4  $\mu$ m); right, quantitation for 30 randomly chosen yeast cells in each condition. Points represent individual cells and bars show mean (p values are indicated; unpaired, two-sided t-test).







**Supplementary Table 1. *C. albicans* proteins with altered abundance in response to T6SS-mediated delivery of Tfe2**

| Protein ID   | Relative abundance (log2 WT/mutant) |               |                          |               | Protein name  | Function                                                                     |
|--------------|-------------------------------------|---------------|--------------------------|---------------|---------------|------------------------------------------------------------------------------|
|              | $\Delta tfe1$                       | $\Delta tfe2$ | $\Delta tfe1\Delta tfe2$ | $\Delta tssE$ |               |                                                                              |
| orf19.4654   | <b>-0.79</b>                        | <b>4.09</b>   | <b>3.11</b>              | <b>3.40</b>   | -             | Protein of unknown function                                                  |
| orf19.1358   | -0.14                               | <b>2.47</b>   | <b>2.78</b>              | <b>2.25</b>   | Gcn4          | bZIP transcription factor, amino acid control response                       |
| orf19.6222.1 | <b>-0.51</b>                        | <b>1.48</b>   | <b>1.33</b>              | <b>1.28</b>   | -             | Protein of unknown function                                                  |
| orf19.5620   | -0.35                               | <b>0.83</b>   | <b>0.71</b>              | <b>0.64</b>   | Phz1 (Yhi9)   | Protein of unknown function                                                  |
| orf19.1340   | <b>-0.45</b>                        | <b>0.82</b>   | <b>0.81</b>              | <b>0.79</b>   | - (Ydl124w)   | Putative aldose reductase                                                    |
| orf19.6689   | -0.20                               | <b>0.78</b>   | <b>0.91</b>              | <b>0.77</b>   | Arg4          | Argininosuccinate lyase                                                      |
| orf19.3841   | 0.37                                | <b>0.72</b>   | <b>0.61</b>              | <b>0.67</b>   | Atg1          | Putative protein Ser/Thr kinase, predicted role in autophagy and Cvt-pathway |
| orf19.6514   | -0.21                               | <b>0.62</b>   | <b>0.67</b>              | <b>0.59</b>   | Cup9 (Tos8)   | Transcription factor                                                         |
| orf19.3142   | -0.23                               | <b>0.56</b>   | <b>0.44</b>              | <b>0.43</b>   | -             | Protein of unknown function                                                  |
| orf19.6245   | -0.24                               | <b>0.55</b>   | <b>0.66</b>              | <b>0.58</b>   | -             | Protein of unknown function                                                  |
| orf19.5720   | -0.05                               | <b>0.55</b>   | <b>0.60</b>              | <b>0.59</b>   | - (Mch4)      | Predicted membrane transporter, member of the monocarboxylate porter family  |
| orf19.6994   | -0.23                               | <b>0.54</b>   | <b>0.42</b>              | <b>0.46</b>   | Bat22 (Bat2)  | Putative branched chain amino acid aminotransferase                          |
| orf19.7469   | -0.11                               | <b>0.52</b>   | <b>0.70</b>              | <b>0.52</b>   | Arg1          | Argininosuccinate synthase                                                   |
| orf19.3770   | -0.33                               | <b>0.51</b>   | <b>0.57</b>              | <b>0.49</b>   | Arg8          | Putative acetylornithine aminotransferase                                    |
| orf19.5645   | -0.07                               | <b>-0.39</b>  | <b>-0.50</b>             | <b>-0.39</b>  | Met15 (Met17) | O-acetylhomoserine O-acetylserine sulphydrylase                              |
| orf19.4099   | 0.00                                | <b>-0.43</b>  | <b>-0.63</b>             | <b>-0.45</b>  | Ecm17 (Met5)  | Putative beta subunit of assimilatory sulphite reductase                     |
| orf19.2451   | 0.15                                | <b>-0.46</b>  | <b>-0.89</b>             | <b>-0.58</b>  | Pga45 (-)     | Putative GPI-anchored cell wall protein                                      |
| orf19.6939   | 0.01                                | <b>-0.47</b>  | <b>-0.48</b>             | <b>-0.46</b>  | -             | Protein of unknown function                                                  |
| orf19.6937   | 0.25                                | <b>-0.50</b>  | <b>-0.57</b>             | <b>-0.52</b>  | Ptr22 (Ptr2)  | Oligopeptide transporter                                                     |
| orf19.4076   | 0.00                                | <b>-0.50</b>  | <b>-0.70</b>             | <b>-0.46</b>  | Met10         | Putative alpha subunit of assimilatory sulphite reductase                    |
| orf19.2661   | -0.20                               | <b>-0.50</b>  | <b>-0.71</b>             | <b>-0.68</b>  | Tlo34 (-)     | Protein of unknown function                                                  |
| orf19.4077   | -0.18                               | <b>-0.56</b>  | <b>-0.53</b>             | <b>-0.58</b>  | Mit1 (Sur1)   | Mannosylinositol phosphorylceramide synthase catalytic subunit               |
| orf19.5642   | -0.30                               | <b>-0.63</b>  | <b>-0.58</b>             | <b>-0.81</b>  | - (Dif1)      | Putative protein regulating nuclear localization of Rnr2 and Rnr4            |
| orf19.5811   | 0.00                                | <b>-0.68</b>  | <b>-0.77</b>             | <b>-0.61</b>  | Met1          | Putative uroporphyrin-3 C-methyltransferase                                  |
| orf19.3642   | 0.33                                | <b>-0.70</b>  | <b>-0.45</b>             | <b>-0.43</b>  | Sun41 (Sun4)  | Cell wall glycosidase                                                        |
| orf19.6600   | -0.10                               | <b>-0.72</b>  | <b>-1.11</b>             | <b>-0.75</b>  | - (Ups1)      | Putative phosphatidic acid transporter activity                              |
| orf19.2738   | 0.04                                | <b>-1.08</b>  | <b>-0.95</b>             | <b>-1.09</b>  | Sul2 (Sul1)   | Sulfate transporter                                                          |
| orf19.668    | -0.20                               | <b>-1.11</b>  | <b>-0.96</b>             | <b>-0.74</b>  | Tos4          | Putative fork-head transcription factor                                      |
| orf19.97     | -0.11                               | <b>-1.34</b>  | <b>-1.43</b>             | <b>-0.97</b>  | Can1          | Basic amino acid permease                                                    |
| orf19.6993   | 0.08                                | <b>-1.83</b>  | <b>-1.62</b>             | <b>-0.64</b>  | Gap2 (Gap1)   | General broad specificity amino acid permease                                |

Proteins are included on the basis of their abundance in the total cellular proteome of *C. albicans* being significantly altered upon co-culture with wild type *S. marcescens* Db10 (WT) compared with the  $\Delta tfe2$  mutant (fold change >1.3, significant t-test for the pairwise comparison (two-sided,  $p < 0.05$ ) and significant ANOVA score ( $p < 0.05$ , multiple sample test) across all conditions), and also showing an equivalent change (>1.3-fold) when comparing the wild type with the  $\Delta tfe1\Delta tfe2$  double mutant and the T6SS-inactive mutant  $\Delta tssE$  ( $n=6$ ). The table summarises the data from six independent biological replicates, analysed using six-plex TMT mass spectrometry, and changes in abundance are presented as log2 of WT/mutant. Protein names are according to the *Candida* Genome Database (CGD), with the *S. cerevisiae* homologue, where different, given in brackets. Fold change values greater than 1.3 are shown in purple and orange (increase or decrease, respectively) and entries are ordered according to changes in  $\Delta tfe2$ . It should be noted that TMT experiments suffer from ratio compression<sup>1</sup> and the ratios are in reality probably higher than reported.

**Supplementary Table 2. Additional Gene Ontology (GO) analysis of Tfe2-dependent *Candida albicans* proteins.**

| GOID                      | GO_term                                            | Count | P-value | Gene(s) annotated to the term                                                                                                                             |
|---------------------------|----------------------------------------------------|-------|---------|-----------------------------------------------------------------------------------------------------------------------------------------------------------|
| <b>Cellular Component</b> |                                                    |       |         |                                                                                                                                                           |
| 5886                      | Plasma membrane                                    | 17    | 0.0047  | C2_00940W_A, ZRT2, ITR1, RTA2, PTR22, GAP2, MET15, SUL2, RHD3, TNA1, CAG1, CTR1, CAN1, CAN2, C7_03350C_A, TPO4, SLP3                                      |
| 9337                      | Sulfite reductase complex (NADPH)                  | 2     | 0.0120  | ECM17, MET10                                                                                                                                              |
| 324                       | Fungal-type vacuole                                | 12    | 0.0174  | NCR1, ITR1, ECM17, RTA2, MIT1, PTR22, GAP2, ATG1, TNA1, VTC3, TPO4, SLP3                                                                                  |
| <b>Molecular Function</b> |                                                    |       |         |                                                                                                                                                           |
| 5215                      | Transporter activity                               | 15    | 0.0031  | NCR1, ZRT2, ITR1, RTA2, PTR22, GAP2, SUL2, TNA1, GNP1, CTR1, CAN1, CAN2, C6_03540W_A, TPO4, CR_09620C_A                                                   |
| ↳ 46943                   | Carboxylic acid transmembrane transporter activity | 6     | 0.0060  | GAP2, TNA1, GNP1, CAN1, CAN2, C6_03540W_A                                                                                                                 |
| ↳ 15181                   | Arginine transmembrane transporter activity        | 3     | 0.0031  | GAP2, CAN1, CAN2                                                                                                                                          |
| ↳ 15193                   | L-proline transmembrane transporter activity       | 2     | 0.0137  | GAP2, GNP1                                                                                                                                                |
| 4783                      | Sulfite reductase (NADPH) activity                 | 2     | 0.0137  | ECM17, MET10                                                                                                                                              |
| <b>Biological Process</b> |                                                    |       |         |                                                                                                                                                           |
| 44281                     | Small molecule metabolic process                   | 21    | 0.0029  | SNZ1, C1_02970W_A, DUR1,2, MET1, RNR21, LYS22, ECM17, BAT22, MET15, SPS20, ARG8, LYS1, C5_00800C_A, HAM1, CAR1, CAG1, ILS1, C7_03350C_A, ARG4, ARG1, VTC3 |
| ↳ 6082                    | Organic acid metabolic process                     | 17    | 0.0003  | SNZ1, C1_02970W_A, MET1, LYS22, ECM17, BAT22, MET15, SPS20, ARG8, LYS1, C5_00800C_A, CAR1, CAG1, ILS1, ARG4, ARG1, VTC3                                   |
| ↳ 6520                    | Cellular amino acid metabolic process              | 14    | 0.0000  | SNZ1, C1_02970W_A, MET1, LYS22, ECM17, BAT22, MET15, ARG8, LYS1, C5_00800C_A, CAR1, ILS1, ARG4, ARG1                                                      |
| ↳ 6525                    | Arginine metabolic process                         | 4     | 0.0020  | ARG8, CAR1, ARG4, ARG1                                                                                                                                    |
| ↳ 6591                    | Ornithine metabolic process                        | 3     | 0.0192  | ARG8, CAR1, ARG4                                                                                                                                          |
| 0097                      | Sulfur amino acid biosynthetic process             | 5     | 0.0057  | SNZ1, C1_02970W_A, MET1, ECM17, MET15                                                                                                                     |

GO-Term analysis of the 76 proteins found to be differentially abundant ( $\pm 1.3$ -fold) in the total proteome of *C. albicans* when co-cultured with wild type *S. marcescens* compared with the  $\Delta tfe2$  mutant. Proteins were included based on a single pairwise comparison, WT/ $\Delta tfe2$  (p-value < 0.05, unpaired two-sided t-test; n=6 biological replicates). Shown are enrichments in the three ontologies 'cellular component', 'molecular function' and 'biological process' (p-value  $\leq 0.02$ ), generated using the GO Term Finder tool at the Candida gene database (<http://www.candidagenome.org/>). Arrows represent parent-child relationships and redundancies were curated manually. This analysis includes an extended set of Tfe2-dependent proteins compared with that depicted in Fig. 5b but identifies very similar areas of metabolism and cellular transport.

**Supplementary Table 3. Strains and Plasmids used in this study.**

| Name                            | Description/ genotype                                                                                                                                                                                                                                                                                                                       | Source / Reference |
|---------------------------------|---------------------------------------------------------------------------------------------------------------------------------------------------------------------------------------------------------------------------------------------------------------------------------------------------------------------------------------------|--------------------|
| <b>Strains</b>                  |                                                                                                                                                                                                                                                                                                                                             |                    |
| <i>Serratia marcescens</i>      |                                                                                                                                                                                                                                                                                                                                             |                    |
| Db10                            | Wild type                                                                                                                                                                                                                                                                                                                                   | 2                  |
| Db11                            | Spontaneous Sm-resistant derivative of Db10                                                                                                                                                                                                                                                                                                 | 2                  |
| SJC11                           | Db10 $\Delta tssE$ ( $\Delta SMDB11\_2271$ )                                                                                                                                                                                                                                                                                                | 3                  |
| SJC3                            | Db10 $\Delta tssH$ ( $\Delta SMDB11\_2274$ )                                                                                                                                                                                                                                                                                                | 3                  |
| KT65                            | Db10 $\Delta tfe1$ ( $\Delta SMDB11\_1112$ )                                                                                                                                                                                                                                                                                                | 4                  |
| KT148                           | Db10 $\Delta tfe2$ ( $\Delta SMDB11\_1083$ )                                                                                                                                                                                                                                                                                                | This study         |
| KT149                           | Db10 $\Delta tfe1\Delta tfe2$ ( $\Delta SMDB11\_1112, \Delta SMDB11\_1083$ )                                                                                                                                                                                                                                                                | This study         |
| KT64                            | Db10 $\Delta sip3$ ( $\Delta SMDB11\_1111$ )                                                                                                                                                                                                                                                                                                | This study         |
| KT69                            | Db10 $\Delta sip3$ , Sm-resistant, derived from KT64 <sup>a</sup>                                                                                                                                                                                                                                                                           | This study         |
| KT66                            | Db10 $\Delta sip3\Delta tfe1$ ( $\Delta SMDB11\_1111-1112$ )                                                                                                                                                                                                                                                                                | This study         |
| KT98                            | Db10 $\Delta sip3\Delta tfe1$ , Sm-resistant, derived from KT66 <sup>a</sup>                                                                                                                                                                                                                                                                | This study         |
| MLM01                           | Db10 $\Delta ssp1-ssp6$ ( $\Delta SMDB11\_2261, \Delta SMDB11\_2264, \Delta SMDB11\_1112, \Delta SMDB11\_3980, \Delta SMDB11\_4628, \Delta SMDB11\_4673$ )                                                                                                                                                                                  | This study         |
| 21C4                            | Db11 <i>shlB</i> ::miniTn5-Cm                                                                                                                                                                                                                                                                                                               | 5                  |
| YL23                            | Db10 <i>shlB</i> ::miniTn5-Cm ( <i>shl</i> )                                                                                                                                                                                                                                                                                                | This study         |
| YL24                            | Db10 $\Delta tssE$ <i>shlB</i> ::miniTn5-Cm ( <i>shl</i> $\Delta tssE$ )                                                                                                                                                                                                                                                                    | This study         |
| <i>Pseudomonas fluorescens</i>  |                                                                                                                                                                                                                                                                                                                                             |                    |
| KT02                            | Sm-resistant derivative of <i>P. fluorescens</i> 55                                                                                                                                                                                                                                                                                         | 3                  |
| <i>Escherichia coli</i>         |                                                                                                                                                                                                                                                                                                                                             |                    |
| CC118 $\lambda$ pir             | Cloning host and donor for pKNG101-based allelic exchange plasmids ( $\lambda$ pir)                                                                                                                                                                                                                                                         | 6                  |
| HH26                            | Mobilizing strain for conjugal transfer                                                                                                                                                                                                                                                                                                     | 7                  |
| pNJ5000                         |                                                                                                                                                                                                                                                                                                                                             |                    |
| <i>Saccharomyces cerevisiae</i> |                                                                                                                                                                                                                                                                                                                                             |                    |
| K699                            | <i>MATa ade2-1 trp1-1 leu2-3,112 his3-11,15 ura3 can1-100</i>                                                                                                                                                                                                                                                                               | 8                  |
| BH01                            | K699 <i>his3</i> ::P <sub>GAL1</sub> <sup>b</sup>                                                                                                                                                                                                                                                                                           | This study         |
| KT164                           | K699 <i>his3</i> ::P <sub>GAL1</sub> -GFP <sup>b</sup>                                                                                                                                                                                                                                                                                      | This study         |
| KT165                           | K699 <i>his3</i> ::P <sub>GAL1</sub> -SMDB11_1083 <sup>b</sup>                                                                                                                                                                                                                                                                              | This study         |
| KT167                           | K699 <i>his3</i> ::P <sub>GAL1</sub> -SMDB11_1112 <sup>b</sup>                                                                                                                                                                                                                                                                              | This study         |
| BY4742                          | <i>MAT<math>\alpha</math> his3<math>\Delta</math>1 leu2<math>\Delta</math>0 lys2<math>\Delta</math>0 ura3<math>\Delta</math>0</i>                                                                                                                                                                                                           | 9                  |
| <i>atg13<math>\Delta</math></i> | BY4742 <i>atg13<math>\Delta</math></i> ::kanMX6                                                                                                                                                                                                                                                                                             | SGDC               |
| BY4741                          | <i>MATa his3<math>\Delta</math>1 leu2<math>\Delta</math>0 met15<math>\Delta</math>0 ura3<math>\Delta</math>0</i>                                                                                                                                                                                                                            | 9                  |
| Can1-GFP                        | BY4741 <i>CAN1-GFP</i> :: <i>his5</i> <sup>+</sup>                                                                                                                                                                                                                                                                                          | 10                 |
| <i>Candida albicans</i>         |                                                                                                                                                                                                                                                                                                                                             |                    |
| SC5314                          | Wild type clinical isolate                                                                                                                                                                                                                                                                                                                  | 11                 |
| KT158                           | SC5314 <i>ADHI/adh1</i> ::P <sub>tet</sub> -caGFP <sup>c</sup>                                                                                                                                                                                                                                                                              | This study         |
| KT159                           | SC5314 <i>ADHI/adh1</i> ::P <sub>tet</sub> -caSMDB11_1112 <sup>c</sup>                                                                                                                                                                                                                                                                      | This study         |
| KT160                           | SC5314 <i>ADHI/adh1</i> ::P <sub>tet</sub> -caSMDB11_1083 <sup>c</sup>                                                                                                                                                                                                                                                                      | This study         |
| <i>tup1<math>\Delta</math></i>  | <i>arg4<math>\Delta</math>/arg4<math>\Delta</math> leu2<math>\Delta</math>/leu2<math>\Delta</math> his1<math>\Delta</math>/his1<math>\Delta</math> URA3/ura3<math>\Delta</math>::imm<sup>434</sup><br/>IRO1/iro1<math>\Delta</math>::imm<sup>434</sup> <i>tup1<math>\Delta</math></i>::<i>HIS1/tup1<math>\Delta</math></i>::<i>LEU2</i></i> | 12                 |
| <i>Candida glabrata</i>         |                                                                                                                                                                                                                                                                                                                                             |                    |
| ATCC2001                        | Wild type                                                                                                                                                                                                                                                                                                                                   | ATCC               |

### **Plasmids**

|           |                                                                                                                                                                          |             |
|-----------|--------------------------------------------------------------------------------------------------------------------------------------------------------------------------|-------------|
| pKNG101   | Suicide vector for allelic exchange ( $\text{Sm}^R$ <i>sacBR mobRK2 oriR6K</i> )                                                                                         | 13          |
| pSC1249   | pKNG101-derived allelic exchange plasmid for the generation of chromosomal in-frame $\Delta\text{SMDB11\_1112}$ ( $\Delta\text{tfe1}$ ) deletion                         | 4           |
| pSC1339   | pKNG101-derived allelic exchange plasmid for the generation of chromosomal in-frame $\Delta\text{SMDB11\_1083}$ ( $\Delta\text{tfe2}$ ) deletion                         | This study  |
| pSC1248   | pKNG101-derived allelic exchange plasmid for the generation of chromosomal in-frame $\Delta\text{SMDB11\_1111}$ ( $\Delta\text{sip3}$ ) deletion                         | This study  |
| pSC1250   | pKNG101-derived allelic exchange plasmid for the generation of chromosomal in-frame $\Delta\text{SMDB11\_1111-1112}$ ( $\Delta\text{sip3}\Delta\text{tfe1}$ ) deletion   | This study  |
| pSC123    | pKNG101-derived allelic exchange plasmid for the generation of chromosomal in-frame $\Delta\text{SMDB11\_2261}$ ( $\Delta\text{ssp1}$ ) deletion                         | 14          |
| pSC125    | pKNG101-derived allelic exchange plasmid for the generation of chromosomal in-frame $\Delta\text{SMDB11\_2264}$ ( $\Delta\text{ssp2}$ ) deletion                         | 14          |
| pSC828    | pKNG101-derived allelic exchange plasmid for the generation of chromosomal in-frame $\Delta\text{SMDB11\_3980}$ ( $\Delta\text{ssp4}$ ) deletion                         | 4           |
| pSC829    | pKNG101-derived allelic exchange plasmid for the generation of chromosomal in-frame $\Delta\text{SMDB11\_4628}$ ( $\Delta\text{ssp5}$ ) deletion                         | 4           |
| pSC1241   | pKNG101-derived allelic exchange plasmid for the generation of chromosomal in-frame $\Delta\text{SMDB11\_4673}$ ( $\Delta\text{ssp6}$ ) deletion                         | 4           |
| pSUPROM   | Vector for constitutive expression of cloned genes under the control of the <i>E. coli</i> <i>tat</i> promoter ( $\text{Kn}^R$ )                                         | 4           |
| pSC1332   | pSUPROM-derived plasmid for constitutive expression of <i>SMDB11_1111-1112</i> ( <i>sip3-tfe1</i> )                                                                      | This study  |
| pSC1343   | pSUPROM-derived plasmid for constitutive expression of <i>SMDB11_1083</i> ( <i>tfe2</i> )                                                                                | This study  |
| pBAD18-Kn | Vector for arabinose-inducible expression of cloned genes under the control of the $P_{\text{ara}}$ promoter                                                             | 15          |
| pSC1231   | pBAD18-Kn-derived plasmid for arabinose-inducible expression of <i>SMDB11_1112</i> ( <i>tfe1</i> )                                                                       | 4           |
| pSC1232   | pBAD18-Kn-derived plasmid for arabinose-inducible expression of <i>SMDB11_1111-1112</i> ( <i>sip3-tfe1</i> )                                                             | 4           |
| pNIM1     | Tetracycline-inducible expression vector for integration into <i>C. albicans</i> ( <i>ADHI</i> locus) carrying the <i>caGFP</i> gene ( $\text{Nat}^R$ , $\text{Amp}^R$ ) | 16          |
| pSC1352   | pNIM-derived plasmid for Tetracycline-inducible expression of <i>caSMDB11_1112</i> <sup>d</sup> ( <i>caTFE1</i> )                                                        | This study  |
| pSC1354   | pNIM-derived plasmid for Tetracycline-inducible expression of <i>caSMDB11_1083</i> <sup>d</sup> ( <i>caTFE2</i> )                                                        | This study  |
| pRB1438   | Yeast expression vector carrying the bi-directional Gal1,10 promoter element ( <i>URA3</i> , <i>CEN</i> , $\text{Amp}^R$ )                                               | D. Botstein |
| pUG23     | Yeast expression vector carrying <i>yEGFP3</i> under <i>MET25</i> promoter ( <i>HIS3</i> , <i>CEN</i> , $\text{Amp}^R$ )                                                 | 17          |
| pSC1356   | pRB1438-derived plasmid for galactose-inducible expression ( $P_{\text{GALI}}$ ) of <i>yEGFP3</i> derived from pUG23                                                     | This study  |
| pSC1296   | pRB1438-derived plasmid for galactose-inducible expression ( $P_{\text{GALI}}$ ) of <i>SMDB11_1112</i> ( <i>TFE1</i> )                                                   | This study  |
| pSC1357   | pRB1438-derived plasmid for galactose-inducible expression ( $P_{\text{GALI}}$ ) of <i>SMDB11_1083</i> ( <i>TFE2</i> )                                                   | This study  |
| pSC1834   | pRB1438-derived plasmid for galactose-inducible expression ( $P_{\text{GALI}}$ ) of <i>SMDB11_2261</i> ( <i>SSP1</i> )                                                   | This study  |
| pSC1832   | pRB1438-derived plasmid for galactose-inducible expression ( $P_{\text{GALI}}$ ) of <i>SMDB11_2264</i> ( <i>SSP2</i> )                                                   | This study  |

|               |                                                                                                                                                                                  |               |
|---------------|----------------------------------------------------------------------------------------------------------------------------------------------------------------------------------|---------------|
| pGED1         | Constitutive expression vector for integration into <i>S. cerevisiae</i> <i>HIS3</i> locus ( <i>LEU2</i> , Amp <sup>R</sup> )                                                    | G. Eitzen     |
| pSC1384       | pGED1 derived plasmid carrying empty P <sub>GALI</sub> promoter construct (integrative)                                                                                          | This study    |
| pSC1379       | pGED1 derived plasmid for galactose-inducible expression (P <sub>GALI</sub> ) of <i>yEFGP3</i> (integrative)                                                                     | This study    |
| pSC1382       | pGED1 derived plasmid for galactose-inducible expression (P <sub>GALI</sub> ) of <i>SMDB11_1112 (TFE1)</i> (integrative)                                                         | This study    |
| pSC1380       | pGED1 derived plasmid for galactose-inducible expression (P <sub>GALI</sub> ) of <i>SMDB11_1083 (TFE2)</i> (integrative)                                                         | This study    |
| GFP-ATG8(416) | pRS416-derived plasmid for expression of N-terminal GFP-tagged <i>ATG8</i> under the control of the endogenous promoter ( <i>URA3</i> , CEN, Amp <sup>R</sup> ), Addgene # 49425 | <sup>18</sup> |

<sup>a</sup> Streptomycin-resistant derivatives were generated by phage  $\phi$ IF3-mediated transduction of the resistance allele from *S. marcescens* Db11, as described previously<sup>14</sup>

<sup>b</sup> The whole cassette containing the indicated target gene under control of the *GALI* promoter and the *LEU2* selection marker was inserted into the *HIS3* allele.

<sup>c</sup> The whole cassette containing rtTA under control of the *ADHI* promoter, the *caSAT1* selection marker, and the indicated target gene under control of the Tet-inducible promoter was inserted into one of the *ADHI* alleles.

<sup>d</sup> CDS was codon optimised for expression in *C. albicans*

**Supplementary Table 4. Oligonucleotide primers and additional details for plasmid construction, primers for Southern blot probe generation and primers for qPCR.**

| Plasmid | Sequence of relevant primers (5'-3') <sup>1</sup>  | Description                                                                            |
|---------|----------------------------------------------------|----------------------------------------------------------------------------------------|
| pSC1339 | TATA <u>TCTAGAG</u> TGCCGATCGATATTGAAGAGG          | Forward primer to clone upstream region of SMDB11_1083 in pKNG101 ( <i>Xba</i> I)      |
|         | TATA <u>AAGCTT</u> TGGCATAGCTGCCCTC                | Reverse primer to clone upstream region of SMDB11_1083 in pKNG101 ( <i>Hind</i> III)   |
|         | TATA <u>AAGCTT</u> CAGGCTGGATAAGCCTTCC             | Forward primer to clone downstream region of SMDB11_1083 in pKNG101 ( <i>Hind</i> III) |
|         | TATAG <u>TCGAC</u> GTTTGGCACCAACCCATC              | Reverse primer to clone downstream region of SMDB11_1083 in pKNG101 ( <i>Sal</i> I)    |
| pSC1248 | TATAGGATCCGACAAAAATGACGG                           | Forward primer to clone upstream region of SMDB11_1111 in pKNG101 ( <i>Bam</i> HI)     |
|         | TATA <u>AAGCTT</u> CGGCTGCATAACCACCC               | Reverse primer to clone upstream region of SMDB11_1111 in pKNG101 ( <i>Hind</i> III)   |
|         | TATA <u>AAGCTT</u> CTAGAGGGTGAAGAGGACAGTCCC        | Forward primer to clone downstream region of SMDB11_1111 in pKNG101 ( <i>Hind</i> III) |
|         | TATAG <u>TCGAC</u> GCAACGGCGGGTTTAAATAAGG          | Reverse primer to clone downstream region of SMDB11_1111 in pKNG101 ( <i>Sal</i> I)    |
| pSC1250 | TATAGGATCCGACAAAAATGACGG                           | Forward primer to clone upstream region of SMDB11_1111 in pKNG101 ( <i>Bam</i> HI)     |
|         | TATA <u>AAGCTT</u> CGGCTGCATAACCACCC               | Reverse primer to clone upstream region of SMDB11_1111 in pKNG101 ( <i>Hind</i> III)   |
|         | TATA <u>AAGCTT</u> GCCTGAGCCGGTCCG                 | Forward primer to clone downstream region of SMDB11_1112 in pKNG101 ( <i>Hind</i> III) |
|         | TATAG <u>TCGAC</u> CTTGTGGCCACCGTCACC              | Reverse primer to clone downstream region of SMDB11_1112 in pKNG101 ( <i>Sal</i> I)    |
| pSC1332 | TATAGGATCCGTGGTTATGCAGCCGTATAAAGAGG                | Forward primer to clone SMDB11_1111-1112 in pSUPROM ( <i>Bam</i> HI)                   |
|         | TATA <u>AAGCTT</u> CAGGCGGGGAAAGGCC                | Reverse primer to clone SMDB11_1111-1112 in pSUPROM ( <i>Hind</i> III)                 |
| pSC1343 | TATAGGATCCATGCCATTAGAAGTCGATGGG                    | Forward primer to clone SMDB11_1083 in pSUPROM ( <i>Bam</i> HI)                        |
|         | TATA <u>AAGCTT</u> TTATCCAGCCTGAGCCAGATC           | Reverse primer to clone SMDB11_1083 in pSUPROM ( <i>Hind</i> III)                      |
| pSC1309 | GCCAGTTCATGGCC <u>TAC</u> TTAGTCACTAC              | Forward primer for QC to delete <i>Msc</i> I site in yEGFP3 (pUG23)                    |
|         | GTAGTGACTAAGGT <u>AG</u> CCATGGAAGTGGC             | Reverse primer for QC to delete <i>Msc</i> I site in yEGFP3 (pUG23)                    |
| pSC1356 | TATAGGATCCATGTCTAAAGGTGAAGAATTATCACTGG             | Forward primer to clone yEGFP3 (pSC1309) in pRB1438 ( <i>Bam</i> HI)                   |
|         | TATA <u>TCTAG</u> ATTATTTGTACAATTCATCCATACCATGG    | Reverse primer to clone yEGFP3 (pSC1309) in pRB1438 ( <i>Xba</i> I)                    |
| pSC1296 | TATAGGATCCATGCATTGGTTGAATTTCAAG                    | Forward primer to clone SMDB11_1112 in pRB1438 ( <i>Bam</i> HI)                        |
|         | TATAGAGCTCAGGCGGGGAAAGG                            | Reverse primer to clone SMDB11_1112 in pRB1438 ( <i>Sac</i> I)                         |
| pSC1357 | TATAGGATCCATGCCATTAGAAGTCGATGGG                    | Forward primer to clone SMDB11_1083 in pRB1438 ( <i>Bam</i> HI)                        |
|         | TATA <u>TCTAG</u> ATTATCCAGCCTGAGCCAGATC           | Reverse primer to clone SMDB11_1083 in pRB1438 ( <i>Xba</i> I)                         |
| pSC1834 | TATAGGATCCATGAAACCTTTATATCGTCAGCTAAAAAGC           | Forward primer to clone SMDB11_2261 in pRB1438 ( <i>Bam</i> HI)                        |
|         | TATA <u>TCTAG</u> ACTAGCTCAACTCCCAAACCAGAC         | Reverse primer to clone SMDB11_2261 in pRB1438 ( <i>Xba</i> I)                         |
| pSC1832 | TATAGGATCCATGAGTCGCCCTTCATTCCAAC                   | Forward primer to clone SMDB11_2264 in pRB1438 ( <i>Bam</i> HI)                        |
|         | TATA <u>TCTAG</u> ATTATTTTAGTAACCATATAGATGCCTCGTTG | Reverse primer to clone SMDB11_2264 in pRB1438 ( <i>Xba</i> I)                         |
| pSC1384 | TATA <u>AGAT</u> TCCTTGAATTTTCAAAAATTCTTAC         | Forward primer to clone P <sub>GAL</sub> I in pGED1 ( <i>Bgl</i> II)                   |
|         | TATAGCATGCTTAGGATCCGGGGTTTTTCTC                    | Reverse primer to clone P <sub>GAL</sub> I in pGED1 ( <i>Sph</i> I)                    |

|         |                                                                                                                                                                                                                                                                                                                                                                                                                                                              |                                                                                                                                                                                       |
|---------|--------------------------------------------------------------------------------------------------------------------------------------------------------------------------------------------------------------------------------------------------------------------------------------------------------------------------------------------------------------------------------------------------------------------------------------------------------------|---------------------------------------------------------------------------------------------------------------------------------------------------------------------------------------|
| pSC1379 | TATA <u>AGATCT</u> CCTTGAATTTTCAAAAATTCTTAC<br>TATAGCATGCTTATTTGTACAATTCATCCATACCATGG                                                                                                                                                                                                                                                                                                                                                                        | Forward primer to clone P <sub>GALI</sub> -yEGFP3 (pSC13756 in pGED1 ( <i>Bgl</i> II))<br>Reverse primer to clone P <sub>GALI</sub> -yEGFP3 (pSC1356) in pGED1 ( <i>Sph</i> I)        |
| pSC1376 | CAGCGGGGAGATGGCCTGGGATGCGGGTG<br>CACCGCATCCCAGGCATCTCCCCGCTG                                                                                                                                                                                                                                                                                                                                                                                                 | Forward primer for QC to delete <i>Sph</i> I site in SMDB11_1112 (pSC1296)<br>Reverse primer for QC to delete <i>Sph</i> I site in SMDB11_1112 (pSC1296)                              |
| pSC1382 | TATA <u>AGATCT</u> CCTTGAATTTTCAAAAATTCTTAC<br>TATAGCATGCTCAGGCGGGGAAAGGCC                                                                                                                                                                                                                                                                                                                                                                                   | Forward primer to clone P <sub>GALI</sub> -SMDB11_1112 in pGED1 ( <i>Bgl</i> II)(pSC1376)<br>Reverse primer to clone P <sub>GALI</sub> -SMDB11_1112 in pGED1 ( <i>Sph</i> I)(pSC1376) |
| pSC1380 | TATA <u>AGATCT</u> CCTTGAATTTTCAAAAATTCTTAC<br>TATAGCATGCTTATCCAGCCTGAGCCAGATC                                                                                                                                                                                                                                                                                                                                                                               | Forward primer to clone P <sub>GALI</sub> -SMDB11_1083 in pGED1 ( <i>Bgl</i> II)(pSC1357)<br>Reverse primer to clone P <sub>GALI</sub> -SMDB11_1083 in pGED1 ( <i>Sph</i> I)(pSC1357) |
| pSC1352 | Synthetic insert produced by Life Technologies of the coding sequence of SMDB11_1112 with all CTG to TTG codon exchanges, cloned into pNIM1 ( <i>Sal</i> I, <i>Bgl</i> II)                                                                                                                                                                                                                                                                                   |                                                                                                                                                                                       |
| pSC1354 | Synthetic insert produced by Life Technologies of the coding sequence of SMDB11_1083 with all CTG to TTG codon exchanges, cloned into pNIM1 ( <i>Sal</i> I, <i>Bgl</i> II)                                                                                                                                                                                                                                                                                   |                                                                                                                                                                                       |
| pGED1   | <i>P<sub>TEF</sub>-NAT1-T<sub>TEF</sub></i> ( <i>Sal</i> I, <i>Eco</i> RI) cut from pAG25 <sup>19</sup> was cloned into Ylplac128 <sup>20</sup> with subsequent introduction of a synthetic <i>HIS3</i> fragment carrying residues 495-623 followed by residues 209-304 of the <i>HIS3</i> CDS ( <i>Hind</i> III, <i>Sal</i> I). Both <i>HIS3</i> regions are joined by a unique <i>Msc</i> I site for linearization to facilitate homologous recombination. |                                                                                                                                                                                       |

### Southern Blot Probe generation

|        |                                                       |                                                                                                                                                                                                                                      |
|--------|-------------------------------------------------------|--------------------------------------------------------------------------------------------------------------------------------------------------------------------------------------------------------------------------------------|
| Probe1 | TGATAGAGACCCAATGCAAAGCC<br>GGCACGAGACGGAAACTCTTTAGG   | Forward primer to generate probe1, situated in homologues region 1 of pNIM1 ( <i>ADH1</i> promoter)<br>Reverse primer to generate probe1, situated in homologues region 1 of pNIM1 ( <i>ADH1</i> promoter)                           |
| Probe2 | GGTTTATCTGACTTGCCAGAAGTCTTC<br>CAGGACCAATCAAGCAATTCAG | Forward primer to generate probe2, situated downstream of homologues region 2 of pNIM1 ( <i>ADH1</i> terminator)<br>Reverse primer to generate probe2, situated downstream of homologues region 2 of pNIM1 ( <i>ADH1</i> terminator) |

### qPCR

|             |                                                     |                                                                                  |
|-------------|-----------------------------------------------------|----------------------------------------------------------------------------------|
| <i>ACT1</i> | CAAGGTATCATGGTCGGTATGG<br>CGTGTTC AATTGGGTAACGTAAAG | Forward primer for qPCR of <i>ACT1</i><br>Reverse primer for qPCR of <i>ACT1</i> |
| <i>AGP1</i> | CGCCATATGTCATTGCTGTTG<br>ACTGGAGTAGAAGGAGGAGTTAG    | Forward primer for qPCR of <i>AGP1</i><br>Reverse primer for qPCR of <i>AGP1</i> |
| <i>GNP1</i> | TTGCTAACGGTGCCTTCTATAC<br>AGCAGGTCTACCTTCCCTATC     | Forward primer for qPCR of <i>GNP1</i><br>Reverse primer for qPCR of <i>GNP1</i> |
| <i>BAP2</i> | GAGGATGGCGTTGAGTCTATC<br>GTCCCAATACCTGTCCCTAAAG     | Forward primer for qPCR of <i>BAP2</i><br>Reverse primer for qPCR of <i>BAP2</i> |
| <i>BAP3</i> | AGGAATCTCGCAATGGGTTAG<br>ATTTGGTACCATCCTCCAAGTC     | Forward primer for qPCR of <i>BAP3</i><br>Reverse primer for qPCR of <i>BAP3</i> |
| <i>DIP5</i> | AACCCTGGTGTGTGGATTAC<br>GACCCAACATTACCATGACTTTG     | Forward primer for qPCR of <i>DIP5</i><br>Reverse primer for qPCR of <i>DIP5</i> |
| <i>CAN1</i> | CGAGAGTAAATGGCGAGGATAC<br>TACCACCAAGGCAATCATAC      | Forward primer for qPCR of <i>CAN1</i><br>Reverse primer for qPCR of <i>CAN1</i> |
| <i>PTR2</i> | GGCTGTTGCCTGCTTTATTTT<br>TCGTAGTCCATAGCGTTCAATTC    | Forward primer for qPCR of <i>PTR2</i><br>Reverse primer for qPCR of <i>PTR2</i> |
| <i>SSY1</i> | GTGGCGATCCAAGACTACTATC<br>GTCCTAAGTCTCCAGTCCATTC    | Forward primer for qPCR of <i>SSY1</i><br>Reverse primer for qPCR of <i>SSY1</i> |
| <i>STP1</i> | GGCCATTCCAGGCAAGATATAC<br>TCTTTGCCTTCCTCTTTGTC      | Forward primer for qPCR of <i>STP1</i><br>Reverse primer for qPCR of <i>STP1</i> |
| <i>STP2</i> | CCAATGTGGAAGACGACAAATC<br>AGCAGTCTTTCTGTGGATGG      | Forward primer for qPCR of <i>STP2</i><br>Reverse primer for qPCR of <i>STP2</i> |

|             |                                                   |                                                                                  |
|-------------|---------------------------------------------------|----------------------------------------------------------------------------------|
| <i>SUL1</i> | GGGTTGGGTATACTGCGTTTAG<br>CCATGAGAGCCGGAATTTGA    | Forward primer for qPCR of <i>SUL1</i><br>Reverse primer for qPCR of <i>SUL1</i> |
| <i>SUL2</i> | ACGGTAAAAGGAGCATGTAG<br>CTGCAATAAGATCCGCAGTAAAC   | Forward primer for qPCR of <i>SUL2</i><br>Reverse primer for qPCR of <i>SUL2</i> |
| <i>GCN4</i> | CGATGTTTCATTGGCTGATAAGG<br>TCTAGAACAGGAGTGGGTAAGA | Forward primer for qPCR of <i>GCN4</i><br>Reverse primer for qPCR of <i>GCN4</i> |

---

<sup>1</sup>Incorporated restriction sites for cloning into the respective vector are underlined.



## Supplementary References

1. Ow, S.Y. *et al.* iTRAQ underestimation in simple and complex mixtures: "the good, the bad and the ugly". *J Proteome Res* **8**, 5347-5355 (2009).
2. Flyg, C., Kenne, K. & Boman, H.G. Insect pathogenic properties of *Serratia marcescens*: phage-resistant mutants with a decreased resistance to *Cecropia* immunity and a decreased virulence to *Drosophila*. *J Gen Microbiol* **120**, 173-181 (1980).
3. Murdoch, S.L. *et al.* The opportunistic pathogen *Serratia marcescens* utilizes type VI secretion to target bacterial competitors. *J Bacteriol* **193**, 6057-6069 (2011).
4. Fritsch, M.J. *et al.* Proteomic identification of novel secreted antibacterial toxins of the *Serratia marcescens* type VI secretion system. *Mol Cell Proteomics* **12**, 2735-2749 (2013).
5. Kurz, C.L. *et al.* Virulence factors of the human opportunistic pathogen *Serratia marcescens* identified by in vivo screening. *EMBO J* **22**, 1451-1460 (2003).
6. Herrero, M., de Lorenzo, V. & Timmis, K.N. Transposon vectors containing non-antibiotic resistance selection markers for cloning and stable chromosomal insertion of foreign genes in gram-negative bacteria. *J Bacteriol* **172**, 6557-6567 (1990).
7. Grinter, N.J. A broad-host-range cloning vector transposable to various replicons. *Gene* **21**, 133-143 (1983).
8. Nasmyth, K., Adolf, G., Lydall, D. & Seddon, A. The identification of a second cell cycle control on the HO promoter in yeast: cell cycle regulation of SW15 nuclear entry. *Cell* **62**, 631-647 (1990).
9. Brachmann, C.B. *et al.* Designer deletion strains derived from *Saccharomyces cerevisiae* S288C: a useful set of strains and plasmids for PCR-mediated gene disruption and other applications. *Yeast* **14**, 115-132 (1998).
10. Huh, W.K. *et al.* Global analysis of protein localization in budding yeast. *Nature* **425**, 686-691 (2003).
11. Gillum, A.M., Tsay, E.Y. & Kirsch, D.R. Isolation of the *Candida albicans* gene for orotidine-5'-phosphate decarboxylase by complementation of *S. cerevisiae ura3* and *E. coli pyrF* mutations. *Mol Gen Genet* **198**, 179-182 (1984).
12. Homann, O.R., Dea, J., Noble, S.M. & Johnson, A.D. A phenotypic profile of the *Candida albicans* regulatory network. *PLoS Genet* **5**, e1000783 (2009).
13. Kaniga, K., Delor, I. & Cornelis, G.R. A wide-host-range suicide vector for improving reverse genetics in gram-negative bacteria: inactivation of the *blaA* gene of *Yersinia enterocolitica*. *Gene* **109**, 137-141 (1991).
14. English, G. *et al.* New secreted toxins and immunity proteins encoded within the Type VI secretion system gene cluster of *Serratia marcescens*. *Mol Microbiol* **86**, 921-936 (2012).
15. Guzman, L.M., Belin, D., Carson, M.J. & Beckwith, J. Tight regulation, modulation, and high-level expression by vectors containing the arabinose P<sub>BAD</sub> promoter. *J Bacteriol* **177**, 4121-4130 (1995).
16. Park, Y.N. & Morschhauser, J. Tetracycline-inducible gene expression and gene deletion in *Candida albicans*. *Eukaryot Cell* **4**, 1328-1342 (2005).
17. Niedenthal, R.K., Riles, L., Johnston, M. & Hegemann, J.H. Green fluorescent protein as a marker for gene expression and subcellular localization in budding yeast. *Yeast* **12**, 773-786 (1996).
18. Guan, J. *et al.* Cvt18/Gsa12 is required for cytoplasm-to-vacuole transport, pexophagy, and autophagy in *Saccharomyces cerevisiae* and *Pichia pastoris*. *Mol Biol Cell* **12**, 3821-3838 (2001).
19. Goldstein, A.L. & McCusker, J.H. Three new dominant drug resistance cassettes for gene disruption in *Saccharomyces cerevisiae*. *Yeast* **15**, 1541-1553 (1999).
20. Gietz, R.D. & Sugino, A. New yeast-*Escherichia coli* shuttle vectors constructed with in vitro mutagenized yeast genes lacking six-base pair restriction sites. *Gene* **74**, 527-534 (1988).
